# Supplementary material for: Guideline appraisal with AGREE II: Systematic review of the current evidence on how users handle the 2 overall assessments
Source: PubMed Central journal article supplement (PMC5373625; doi:10.1371/journal.pone.0174831), 2017-03-30
Supplement: pone.0174831.s001.pdf [file pone.0174831.s001.pdf]

## S1: Search strategy

### 1. EMBASE

#### Search interface: Ovid

Embase 1974 to 2016 January 13

| #  | Searches                                                |
|----|---------------------------------------------------------|
| 1  | exp practice guideline/                                 |
| 2  | guideline*.ti,ab.                                       |
| 3  | or/1-2                                                  |
| 4  | (agree* adj5 (instrument* or criteria*)).ti,ab.         |
| 5  | (apprais* adj7 evaluat*).ti,ab.                         |
| 6  | (quality* adj5 (tool* or instrument*)).ti,ab.           |
| 7  | or/4-6                                                  |
| 8  | 3 and 7                                                 |
| 9  | limit 8 to ((english or german) and yr="2009 -Current") |
| 10 | 9 not medline*.cr.                                      |

### 2. MEDLINE

#### Search interface: Ovid

- Ovid MEDLINE(R) In-Process & Other Non-Indexed Citations January 13, 2016
- Ovid MEDLINE(R) 1946 to January Week 1 2016
- Ovid MEDLINE(R) Daily Update January 13, 2016

| # | Searches                      |
|---|-------------------------------|
| 1 | Practice Guidelines as Topic/ |

|   |                                                         |
|---|---------------------------------------------------------|
| 2 | guideline*.ti,ab.                                       |
| 3 | or/1-2                                                  |
| 4 | (agree* adj5 (instrument* or criteria*)).ti,ab.         |
| 5 | (apprais* adj7 evaluat*).ti,ab.                         |
| 6 | (quality* adj5 (tool* or instrument*)).ti,ab.           |
| 7 | or/4-6                                                  |
| 8 | 3 and 7                                                 |
| 9 | limit 8 to ((english or german) and yr="2009 -Current") |

### 3. PubMed

#### Search interface: NLM

- PubMed - as supplied by publisher
- PubMed - in process
- PubMed – OLDMEDLINE
- PubMed – pubmednotmedline

| Search | Query                                                                                                |
|--------|------------------------------------------------------------------------------------------------------|
| #1     | Search guideline*[tiab]                                                                              |
| #2     | Search ((agree*[tiab] AND (instrument*[tiab] OR criteria*[tiab])))                                   |
| #3     | Search (apprais*[tiab] AND evaluat*[tiab])                                                           |
| #4     | Search ((quality*[tiab] AND (tool*[tiab] OR instrument*[tiab])))                                     |
| #5     | Search (#2 OR #3 OR #4)                                                                              |
| #6     | Search (#1 AND #5)                                                                                   |
| #7     | Search (#6 not medline[sb])                                                                          |
| #8     | Search (#6 not medline[sb]) Filters: Publication date from 2009/01/01 to 2016/12/31; English; German |

#### 4. The Cochrane Library

##### Search interface: Wiley

- Database of Abstracts of Reviews of Effect : Issue 2 of 4, April 2015
- Health Technology Assessment Database : Issue 4 of 4, October 2015

| <b>ID</b> | <b>Search</b>                                                                             |
|-----------|-------------------------------------------------------------------------------------------|
| #1        | MeSH descriptor: [Practice Guidelines as Topic] explode all trees                         |
| #2        | guideline*                                                                                |
| #3        | #1 or #2                                                                                  |
| #4        | (agree* near/5 (instrument* or criteria*))                                                |
| #5        | (apprais* near/7 evaluat*)                                                                |
| #6        | (quality* near/5 (tool* or instrument*))                                                  |
| #7        | #4 or #5 or #6                                                                            |
| #8        | #3 and #7 Publication Year from 2009 to 2016, in Other Reviews and Technology Assessments |
