# Supplementary material for: Guideline appraisal with AGREE II: Systematic review of the current evidence on how users handle the 2 overall assessments
Source: PubMed Central journal article supplement (PMC5373625; doi:10.1371/journal.pone.0174831), 2017-03-30
Supplement: pone.0174831.s002.pdf [file pone.0174831.s002.pdf]

## 1 **S2: Publications included**

2 [1] Abdelsattar ZM, Reames BN, Regenbogen SE, Hendren S, Wong SL. Critical evaluation  
3 of the scientific content in clinical practice guidelines. *Cancer*. 2015;121:783-9.

4 [2] Acuna-Izcaray A, Sanchez-Angarita E, Plaza V, Rodrigo G, Montes de Oca M, Gich I, et  
5 al. Quality assessment of asthma clinical practice guidelines: a systematic appraisal. *Chest*.  
6 2013;144:390-7.

7 [3] Agrawal S, Jones B, Barnes R, Kibbler C, Millen M, Ashcroft M, et al. A practical  
8 critique of antifungal treatment guidelines for haemato-oncologists. *Crit Rev Microbiol*.  
9 2012;38:203-16.

10 [4] Al-Ansary LA, Tricco AC, Adi Y, Bawazeer G, Perrier L, Al-Ghonaim M, et al. A  
11 systematic review of recent clinical practice guidelines on the diagnosis, assessment and  
12 management of hypertension. *PLoS One*. 2013;8:e53744.

13 [5] Altman RD, Schemitsch E, Bedi A. Assessment of clinical practice guideline  
14 methodology for the treatment of knee osteoarthritis with intra-articular hyaluronic acid.  
15 *Semin Arthritis Rheum*. 2015;45:132-9.

16 [6] Alvarez-Vargas ML, Galvez-Olortegui JK, Galvez-Olortegui TV, Sosa-Rosado JM,  
17 Camacho-Saavedra LA. Clinical practice guidelines in hypertension: a review. *Medwave*.  
18 2015;15:e6290.

19 [7] Arevalo-Rodriguez I, Pedraza OL, Rodriguez A, Sanchez E, Gich I, Sola I, et al.  
20 Alzheimer's disease dementia guidelines for diagnostic testing: a systematic review. *Am J*  
21 *Alzheimers Dis Other Demen*. 2013;28:111-9.

22 [8] Armstrong JJ, Rodrigues IB, Wasiuta T, MacDermid JC. Quality assessment of  
23 osteoporosis clinical practice guidelines for physical activity and safe movement: an AGREE  
24 II appraisal. *Arch Osteoporos*. 2016;11:6.

25 [9] Avin KG, Hanke TA, Kirk-Sanchez N, McDonough CM, Shubert TE, Hardage J, et al.  
26 Management of falls in community-dwelling older adults: clinical guidance statement from  
27 the Academy of Geriatric Physical Therapy of the American Physical Therapy Association.  
28 *Phys Ther*. 2015;95:815-34.

29 [10] Barber CE, Smith A, Esdaile JM, Barnabe C, Martin LO, Faris P, et al. Best practices for  
30 cardiovascular disease prevention in rheumatoid arthritis: a systematic review of guideline  
31 recommendations and quality indicators. *Arthritis Care Res (Hoboken)*. 2015;67:169-79.

32 [11] Bekkering GE, Aertgeerts B, Asueta-Lorente JF, Autrique M, Goossens M, Smets K, et  
33 al. Practitioner review: evidence-based practice guidelines on alcohol and drug misuse among  
34 adolescents; a systematic review. *J Child Psychol Psychiatry*. 2014;55:3-21.

35 [12] Binepal N, Lemyre B, Dunn S, Daboval T, Aglipay M, Leduc S, et al. Systematic review  
36 and quality appraisal of international guidelines on perinatal care of extremely premature  
37 infants. *Curr Pediatr Rev*. 2015;11:126-34.

- 38 [13] Birken SA, Ellis SD, Walker JS, DiMartino LD, Check DK, Gerstel AA, et al.  
39 Guidelines for the use of survivorship care plans: a systematic quality appraisal using the  
40 AGREE II instrument. *Implement Sci.* 2015;10:63.
- 41 [14] Bragge P, Pattuwage L, Marshall S, Pitt V, Piccenna L, Stergiou-Kita M, et al. Quality of  
42 guidelines for cognitive rehabilitation following traumatic brain injury. *J Head Trauma*  
43 *Rehabil.* 2014;29:277-89.
- 44 [15] Brosseau L, Rahman P, Poitras S, Toupin-April K, Paterson G, Smith C, et al. A  
45 systematic critical appraisal of non-pharmacological management of rheumatoid arthritis with  
46 Appraisal of Guidelines for Research and Evaluation II. *PLoS One.* 2014;9:e95369.
- 47 [16] Brosseau L, Rahman P, Toupin-April K, Poitras S, King J, De Angelis G, et al. A  
48 systematic critical appraisal for non-pharmacological management of osteoarthritis using the  
49 Appraisal of Guidelines Research and Evaluation II instrument. *PLoS One.* 2014;9:e82986.
- 50 [17] Burda BU, Chambers AR, Johnson JC. Appraisal of guidelines developed by the World  
51 Health Organization. *Public Health.* 2014;128:444-74.
- 52 [18] Burnett HF, Tanoshima R, Chandranipapongse W, Madadi P, Ito S, Ungar WJ. Testing  
53 for thiopurine methyltransferase status for safe and effective thiopurine administration: a  
54 systematic review of clinical guidance documents. *Pharmacogenomics J.* 2014;14:493-502.
- 55 [19] Cassis L, Cortes-Saladelafont E, Molero-Luis M, Yubero D, Gonzalez MJ, Herrero AO,  
56 et al. Review and evaluation of the methodological quality of the existing guidelines and  
57 recommendations for inherited neurometabolic disorders. *Orphanet J Rare Dis.* 2015;10:164.
- 58 [20] Castellani A, Girlanda F, Barbui C. Rigour of development of clinical practice guidelines  
59 for the pharmacological treatment of bipolar disorder: systematic review. *J Affect Disord.*  
60 2015;2015:45-50.
- 61 [21] Chen Y, Hu S, Wu L, Fang X, Xu W, Shen G. Clinical practice guidelines for  
62 hypertension in China: a systematic review of the methodological quality. *BMJ Open.*  
63 2015;5:e008099.
- 64 [22] Chua ME, Mendoza J, See M, Esmena E, Aguila D, Silangcruz JM, et al. A critical  
65 review of recent clinical practice guidelines on the diagnosis and treatment of non-neurogenic  
66 male lower urinary tract symptoms. *Can Urol Assoc J.* 2015;9:E463-E70.
- 67 [23] Colebatch-Bourn AN, Conaghan PG, Arden NK, Cooper C, Dougados M, Edwards CJ.  
68 Raising the quality of rheumatology management recommendations: lessons from the  
69 EULAR process 10 years after provision of standard operating procedures. *Rheumatology*  
70 (Oxford). 2015;54:1392-6.
- 71 [24] Damiani G, Silvestrini G, Trozzi L, Maci D, Iodice L, Ricciardi W. Quality of dementia  
72 clinical guidelines and relevance to the care of older people with comorbidity: evidence from  
73 the literature. *Clin Interv Aging.* 2014;9:1399-407.

- 74 [25] Dersch R, Toews I, Sommer H, Rauer S, Meerpohl JJ. Methodological quality of  
75 guidelines for management of Lyme neuroborreliosis. *BMC Neurol.* 2015;15:242.
- 76 [26] Don-Wauchope AC, Sievenpiper JL, Hill SA, Iorio A. Applicability of the AGREE II  
77 instrument in evaluating the development process and quality of current National Academy of  
78 Clinical Biochemistry guidelines. *Clin Chem.* 2012;58:1426-37.
- 79 [27] Falconi M, Crippa S, Chari S, Conlon K, Kim SW, Levy P, et al. Quality assessment of  
80 the guidelines on cystic neoplasms of the pancreas. *Pancreatology.* 2015;15:463-9.
- 81 [28] Fisher AR. Development of clinical practice guidelines for urinary continence care of  
82 adult stroke survivors in acute and rehabilitation settings. *Can J Neurosci Nurs.* 2014;36:16-  
83 31.
- 84 [29] Fouche PF, Zverinova KM. The Australian resuscitation council guideline for managing  
85 acute dysrhythmias: an appraisal. *Australasian Journal of Paramedicine.* 2014;11:article 4.
- 86 [30] Gamst-Jensen H, Vedel PN, Lindberg-Larsen VO, Egerod I. Acute pain management in  
87 burn patients: appraisal and thematic analysis of four clinical guidelines. *Burns.*  
88 2014;40:1463-9.
- 89 [31] Gandhi S, Verma S, Ethier JL, Simmons C, Burnett H, Alibhai SMH. A systematic  
90 review and quality appraisal of international guidelines for early breast cancer systemic  
91 therapy: are recommendations sensitive to different global resources? *Breast.* 2015;24:309-17.
- 92 [32] Gillon TE, Pels A, Von Dadelszen P, MacDonell K, Magee LA. Hypertensive disorders  
93 of pregnancy: a systematic review of international clinical practice guidelines. *PLoS One.*  
94 2014;9:e113715.
- 95 [33] Girardis M, Cantaroni C, Savoia G, Melotti R, Conti G. A critical appraisal of the quality  
96 of analgosedation guidelines in critically ill patients. *Minerva Anesthesiol.* 2016;82:230-5.
- 97 [34] Goyet S, Barennes H, Libourel T, Van Griensven J, Frutos R, Tarantola A. Knowledge  
98 translation: a case study on pneumonia research and clinical guidelines in a low- income  
99 country. *Implement Sci.* 2014;9:82.
- 100 [35] Grimmer K, Dizon JM, Milanese S, King E, Beaton K, Thorpe O, et al. Efficient clinical  
101 evaluation of guideline quality: development and testing of a new tool. *BMC Med Res*  
102 *Methodol.* 2014;14:63.
- 103 [36] Gupta M, McCauley J, Farkas A, Gudeloglu A, Neuberger MM, Ho YY, et al. Clinical  
104 practice guidelines on prostate cancer: a critical appraisal. *J Urol.* 2015;193:1153-8.
- 105 [37] Gutarra-Vilchez RB, Barajas-Nava L, Aleman A, Sola I, Gich I, Bonfill X, et al.  
106 Systematic evaluation of the quality of clinical practice guidelines on the use of assisted  
107 reproductive techniques. *Hum Fertil.* 2014;17:28-36.
- 108 [38] Haddadi M, Muhammadnejad S, Sadeghi-Fazel F, Zandieh Z, Rahimi G, Sadighi S, et al.  
109 Systematic review of available guidelines on fertility preservation of young patients with  
110 breast cancer. *Asian Pac J Cancer Prev.* 2015;16:1057-62.

- 111 [39] Haran C, Van Driel M, Mitchell BL, Brodribb WE. Clinical guidelines for postpartum  
112 women and infants in primary care: a systematic review. *BMC Pregnancy Childbirth*.  
113 2014;14:51.
- 114 [40] Harris SR, Schmitz KH, Campbell KL, McNeely ML. Clinical practice guidelines for  
115 breast cancer rehabilitation: syntheses of guideline recommendations and qualitative  
116 appraisals. *Cancer*. 2012;118:2312-24.
- 117 [41] He Z, Tian H, Song A, Jin L, Zhou X, Liu X, et al. Quality appraisal of clinical practice  
118 guidelines on pancreatic cancer: a PRISMA-compliant article. *Medicine (Baltimore)*.  
119 2015;94:e635.
- 120 [42] Heine C, O'Halloran R. Central Auditory Processing Disorder: a systematic search and  
121 evaluation of clinical practice guidelines. *J Eval Clin Pract*. 2015;21:988-94.
- 122 [43] Henig O, Yahav D, Leibovici L, Paul M. Guidelines for the treatment of pneumonia and  
123 urinary tract infections: evaluation of methodological quality using the Appraisal of  
124 Guidelines, Research and Evaluation II instrument. *Clin Microbiol Infect*. 2013;19:1106-14.
- 125 [44] Holmer HK, Ogden LA, Burda BU, Norris SL. Quality of clinical practice guidelines for  
126 glycemic control in type 2 diabetes mellitus. *PLoS One*. 2013;8:e58625.
- 127 [45] Holvoet T, Raevens S, Vandewynckel YP, Van Biesen W, Geboes K, Van Vlierberghe  
128 H. Systematic review of guidelines for management of intermediate hepatocellular carcinoma  
129 using the Appraisal of Guidelines Research and Evaluation II instrument. *Dig Liver Dis*.  
130 2015;47:877-83.
- 131 [46] Horner K, O'Malley L, Taylor K, Glennly AM. Guidelines for clinical use of CBCT: a  
132 review. *Dentomaxillofac Radiol*. 2014;44:20140225.
- 133 [47] Huang M, Zhou X. Appraisal of guidelines for androgenetic alopecia using the Appraisal  
134 of Guidelines for Research and Evaluation II instrument. *J Eval Clin Pract*. 2015;21:1089-94.
- 135 [48] Huang TW, Lai JH, Wu MY, Chen SL, Wu CH, Tam KW. Systematic review of clinical  
136 practice guidelines in the diagnosis and management of thyroid nodules and cancer. *BMC*  
137 *Med*. 2013;11:191.
- 138 [49] Jiang Y, Zhu XD, Qu S, Li L, Zhou Z. Guidelines for squamous cell carcinoma of the  
139 head and neck: a systematic assessment of quality. *Ear Nose Throat J*. 2015;94:E14.
- 140 [50] Jokhan S, Whitworth MK, Jones F, Saunders A, Heazell AE. Evaluation of the quality of  
141 guidelines for the management of reduced fetal movements in UK maternity units. *BMC*  
142 *Pregnancy Childbirth*. 2015;15:54.
- 143 [51] Joosen MC, Brouwers EP, Van Beurden KM, Terluin B, Ruotsalainen JH, Woo JM, et al.  
144 An international comparison of occupational health guidelines for the management of mental  
145 disorders and stress-related psychological symptoms. *Occup Environ Med*. 2015;72:313-22.
- 146 [52] Kawala C, Fernando D, Tan JK. Quality appraisal of acne clinical practice guidelines,  
147 2008-2013. *J Cutan Med Surg*. 2014;18:1-7.

- 148 [53] Kim SG, Jung HK, Lee HL, Jang JY, Lee H, Kim CG, et al. Guidelines for the diagnosis  
149 and treatment of *Helicobacter pylori* infection in Korea, 2013 revised edition. *J Gastroenterol*  
150 *Hepatol.* 2014;29:1371-86.
- 151 [54] Kirby JS, Scharnitz T, Seiverling EV, Ahrns H, Ferguson S. Actinic keratosis clinical  
152 practice guidelines: an appraisal of quality. *Dermatology Research and Practice.*  
153 2015;2015:456071.
- 154 [55] Koh C, Zhao X, Samala N, Sakiani S, Liang TJ, Talwalkar JA. AASLD clinical practice  
155 guidelines: a critical review of scientific evidence and evolving recommendations.  
156 *Hepatology.* 2013;58:2142-52.
- 157 [56] Kredo T, Gerritsen A, Van Heerden J, Conway S, Siegfried N. Clinical practice  
158 guidelines within the Southern African Development Community: a descriptive study of the  
159 quality of guideline development and concordance with best evidence for five priority  
160 diseases. *Health Res Policy Syst.* 2012;10:1.
- 161 [57] Lambert E, Carey S. Practice guideline recommendations on perioperative fasting: a  
162 systematic review. *JPEN J Parenter Enteral Nutr.* 09.01.2015 [Epub ahead of print].
- 163 [58] Langton JM, Drew AK, Mellish L, Olivier J, Ward RL, Pearson SA. The quality of web-  
164 based oncology guidelines and protocols: how do international sites stack up? *Br J Cancer.*  
165 2011;105:1166-72.
- 166 [59] Langton JM, Pearson SA. eviQ cancer treatments online: how does the web-based  
167 protocol system fare in a comprehensive quality assessment? *Asia Pac J Clin Oncol.*  
168 2011;7:357-63.
- 169 [60] Larmer PJ, Reay ND, Aubert ER, Kersten P. Systematic review of guidelines for the  
170 physical management of osteoarthritis. *Arch Phys Med Rehabil.* 2014;95:375-89.
- 171 [61] Lee GY, Yamada J, Kyololo OB, Shorkey A, Stevens B. Pediatric clinical practice  
172 guidelines for acute procedural pain: a systematic review. *Pediatrics.* 2014;133:500-15.
- 173 [62] Li CC, Wang YQ, Li YP, Li XL. Critical appraisal of clinical practice guidelines for  
174 treating pancreatic cancer based on the global disease burden. *J Evid Based Med.* 2015;8:11-  
175 21.
- 176 [63] Li ZY, Luo L, Hu YH, Chen H, Den YK, Tang L, et al. Lung cancer screening: a  
177 systematic review of clinical practice guidelines. *Int J Clin Pract.* 2016;70:20-30.
- 178 [64] Loder E, Burch R, Rizzoli P. The 2012 AHS/AAN guidelines for prevention of episodic  
179 migraine: a summary and comparison with other recent clinical practice guidelines. *Headache.*  
180 2012;52:930-45.
- 181 [65] Lopez-Vargas PA, Tong A, Sureshkumar P, Johnson DW, Craig JC. Prevention,  
182 detection and management of early chronic kidney disease: a systematic review of clinical  
183 practice guidelines. *Nephrology.* 2013;18:592-604.

- 184 [66] Luitjes SHE, Wouters MGAJ, Konig T, Hollander KW, Van Os ME, Van Tulder MW, et  
185 al. Hypertensive disorders in pregnancy: a review of international guidelines. *Hypertens*  
186 *Pregnancy*. 2013;32:367-77.
- 187 [67] Lytras T, Bonovas S, Chronis C, Konstantinidis AK, Kopsachilis F, Papamichail DP, et  
188 al. Occupational asthma guidelines: a systematic quality appraisal using the AGREE II  
189 instrument. *Occup Environ Med*. 2014;71:81-6.
- 190 [68] Marciano NJ, Merlin TL, Bessen T, Street JM. To what extent are current guidelines for  
191 cutaneous melanoma follow up based on scientific evidence? *Int J Clin Pract*. 2014;68:761-  
192 70.
- 193 [69] Nagler EV, Vanmassenhove J, Van der Veer SN, Nistor I, Van Biesen W, Webster AC,  
194 et al. Diagnosis and treatment of hyponatremia: a systematic review of clinical practice  
195 guidelines and consensus statements. *BMC Med*. 2014;12:1.
- 196 [70] Nelson AE, Allen KD, Golightly YM, Goode AP, Jordan JM. A systematic review of  
197 recommendations and guidelines for the management of osteoarthritis: The Chronic  
198 Osteoarthritis Management Initiative of the U.S. Bone and Joint Initiative. *Semin Arthritis*  
199 *Rheum*. 2014;43:701-12.
- 200 [71] Norberg MM, Turner MW, Rooke SE, Langton JM, Gates PJ. An evaluation of web-  
201 based clinical practice guidelines for managing problems associated with cannabis use. *J Med*  
202 *Internet Res*. 2012;14:e169.
- 203 [72] Nowobilski R, Plaszewski M, Wloch T, Mika P, Gajewski P, Brozek JL. Physiotherapy  
204 in asthma: seeking consensus. *J Asthma*. 2013;50:681-6.
- 205 [73] Nuckols TK, Anderson L, Popescu I, Diamant AL, Doyle B, Di Capua P, et al. Opioid  
206 prescribing: a systematic review and critical appraisal of guidelines for chronic pain. *Ann*  
207 *Intern Med*. 2014;160:38-47.
- 208 [74] Nuki G. An appraisal of the 2012 American College of Rheumatology guidelines for the  
209 management of gout. *Curr Opin Rheumatol*. 2014;26:152-61.
- 210 [75] Olivera MJ, Fory JA, Olivera AJ. Quality assessment of clinical practice guidelines for  
211 Chagas disease. *Rev Soc Bras Med Trop*. 2015;48:343-6.
- 212 [76] Padjas A, Kehar R, Aleem S, Mejza F, Bousquet J, Schünemann HJ, et al.  
213 Methodological rigor and reporting of clinical practice guidelines in patients with allergic  
214 rhinitis: QuGAR study. *J Allergy Clin Immunol*. 2014;133:777-83.e4.
- 215 [77] Pak KJ, Hu T, Fee C, Wang R, Smith M, Bazzano LA. Acute hypertension: a systematic  
216 review and appraisal of guidelines. *Ochsner J*. 2014;14:655-63.
- 217 [78] Parisi P, Vanacore N, Belcastro V, Carotenuto M, Del Giudice E, Mariani R, et al.  
218 Clinical guidelines in pediatric headache: evaluation of quality using the AGREE II  
219 instrument. *J Headache Pain*. 2014;15:57.

- 220 [79] Piano V, Schalkwijk A, Burgers J, Verhagen S, Kress H, Hekster Y, et al. Guidelines for  
221 neuropathic pain management in patients with cancer: a European survey and comparison.  
222 *Pain Practice*. 2013;13:349-57.
- 223 [80] Polus S, Lerberg P, Vogel J, Watananirun K, Souza JP, Mathai M, et al. Appraisal of  
224 WHO guidelines in maternal health using the AGREE II assessment tool. *PLoS One*.  
225 2012;7:e38891.
- 226 [81] Qaseem A, Barry MJ, Denberg TD, Owens DK, Shekelle P. Screening for prostate  
227 cancer: a guidance statement from the Clinical Guidelines Committee of the American  
228 College of Physicians. *Ann Intern Med*. 2013;158:761-9.
- 229 [82] Rapoport MJ, Weegar K, Kadulina Y, Bedard M, Carr D, Charlton JL, et al. An  
230 international study of the quality of national-level guidelines on driving with medical illness.  
231 *QJM*. 2015;108:859-69.
- 232 [83] Rios E, Seron P, Lanas F, Bonfill X, Quigley EMM, Alonso-Coello P. Evaluation of the  
233 quality of clinical practice guidelines for the management of esophageal or gastric variceal  
234 bleeding. *Eur J Gastroenterol Hepatol*. 2014;26:422-31.
- 235 [84] Rohde A, Worrall L, Le Dorze G. Systematic review of the quality of clinical guidelines  
236 for aphasia in stroke management. *J Eval Clin Pract*. 2013;19:994-1003.
- 237 [85] Sabharwal S, Gauher S, Kyriacou S, Patel V, Holloway I, Athanasiou T. Quality  
238 assessment of guidelines on thromboprophylaxis in orthopaedic surgery. *Bone Joint J*.  
239 2014;96-B:19-23.
- 240 [86] Sabharwal S, Patel NK, Gauher S, Holloway I, Athanasiou T. High methodologic quality  
241 but poor applicability: assessment of the AAOS guidelines using the AGREE II instrument.  
242 *Clin Orthop*. 2014;472:1982-8.
- 243 [87] San Martin-Galindo L, Rodriguez-Lozano FJ, Abalos-Labruzzo C, Niederman R.  
244 European Fissure Sealant Guidelines: assessment using AGREE II. *Int J Dent Hyg*.  
245 11.09.2015 [Epub ahead of print].
- 246 [88] Sanclemente G, Acosta JL, Tamayo ME, Bonfill X, Alonso-Coello P. Clinical practice  
247 guidelines for treatment of acne vulgaris: a critical appraisal using the AGREE II instrument.  
248 *Arch Dermatol Res*. 2014;306:269-77.
- 249 [89] Santos F, Sola I, Rigau D, Arevalo-Rodriguez I, Seron P, Alonso-Coello P, et al. Quality  
250 assessment of clinical practice guidelines for the prescription of antidepressant drugs during  
251 pregnancy. *Curr Clin Pharmacol*. 2012;7:7-14.
- 252 [90] Schildmann EK, Schildmann J, Kiesewetter I. Medication and monitoring in palliative  
253 sedation therapy: a systematic review and quality assessment of published guidelines. *J Pain*  
254 *Symptom Manage*. 2015;49:734-46.

- 255 [91] Schoenmaker NJ, Tromp WF, Van der Lee JH, Offringa M, Craig JC, Groothoff JW.  
256 Quality and consistency of clinical practice guidelines for the management of children on  
257 chronic dialysis. *Nephrology Dialysis Transplantation*. 2013;28:3052-61.
- 258 [92] Seron P, Lanas F, Rios E, Bonfill X, Alonso-Coello P. Evaluation of the quality of  
259 clinical guidelines for cardiac rehabilitation: a critical review. *J Cardiopulm Rehabil Prev*.  
260 2014;35:1-12.
- 261 [93] Shen J, Sun M, Zhou B, Yan J. Nonconformity in the clinical practice guidelines for  
262 subclinical Cushing's syndrome: which guidelines are trustworthy? *Eur J Endocrinol*.  
263 2014;171:421-31.
- 264 [94] Simons JE, Don-Wauchope AC. Evaluation of natriuretic peptide recommendations in  
265 heart failure clinical practice guidelines. *Clin Biochem*. 2016;49:8-15.
- 266 [95] Smith CAM, Toupin-April K, Jutai JW, Duffy CM, Rahman P, Cavallo S, et al. A  
267 systematic critical appraisal of clinical practice guidelines in juvenile idiopathic arthritis using  
268 the appraisal of guidelines for research and evaluation II (AGREE II) instrument. *PLoS One*.  
269 2015;10:e0137180.
- 270 [96] Stacey D, Macartney G, Carley M, Harrison MB, Costars TP. Development and  
271 evaluation of evidence-informed clinical nursing protocols for remote assessment, triage and  
272 support of cancer treatment-induced symptoms. *Nurs Res Pract*. 2013;2013:171872.
- 273 [97] Syan R, Brucker BM. Guideline of guidelines: urinary incontinence. *BJU Int*.  
274 2016;117:20-33.
- 275 [98] Tian H, Gou Y, Pan Y, Li Q, Wei D, Wang Z, et al. Quality appraisal of clinical practice  
276 guidelines on glioma. *Neurosurg Rev*. 2015;38:39-47.
- 277 [99] Tremblay MS, Kho ME, Tricco AC, Duggan M. Process description and evaluation of  
278 Canadian physical activity guidelines development. *Int J Behav Nutr Phys Act*. 2010;7:42.
- 279 [100] Tudor KI, Kozina PN, Marusic A. Methodological rigour and transparency of clinical  
280 practice guidelines developed by neurology professional societies in Croatia. *PLoS One*.  
281 2013;8:e69877.
- 282 [101] Tunnicliffe DJ, Singh-Grewal D, Kim S, Craig JC, Tong A. Diagnosis, monitoring, and  
283 treatment of systemic lupus erythematosus: a systematic review of clinical practice guidelines.  
284 *Arthritis Care Res*. 2015;67:1440-52.
- 285 [102] Vanclooster A, Cassiman D, Van Steenberghe W, Swinkels DW, Janssen MCH, Drenth  
286 JPH, et al. The quality of hereditary haemochromatosis guidelines: a comparative analysis.  
287 *Clin Res Hepatol Gastroenterol*. 2015;39:205-14.
- 288 [103] Vanommeslaeghe F, De Mulder E, Van De Bruaene C, Van De Bruaene L, Lameire N,  
289 Van Biesen W. Selecting a strategy for prevention of contrast-induced nephropathy in clinical  
290 practice: an evaluation of different clinical practice guidelines using the AGREE tool.  
291 *Nephrol Dial Transplant*. 2015;30:1300-6.



- 292 [104] Wang Y, Luo Q, Li Y, Wang H, Deng S, Wei S, et al. Quality assessment of clinical  
293 practice guidelines on the treatment of hepatocellular carcinoma or metastatic liver cancer.  
294 PLoS One. 2014;9:e103939.
- 295 [105] Werner RN, Marinovic B, Rosumeck S, Strohal R, Haering NS, Weberschock T, et al.  
296 The quality of European dermatological guidelines: critical appraisal of the quality of EDF  
297 guidelines using the AGREE II instrument. *J Eur Acad Dermatol Venereol.* 2016;30:395-403.
- 298 [106] White PE, Shee AW, Finch CF. Independent appraiser assessment of the quality,  
299 methodological rigour and transparency of the development of the 2008 international  
300 consensus statement on concussion in sport. *Br J Sports Med.* 2014;48:130-4.
- 301 [107] Wilby KJ, Black EK, MacLeod C, Wiens M, Lau TTY, Paiva MA, et al. Critical  
302 appraisal of clinical practice guidelines in pediatric infectious diseases. *Int J Clin Pharm.*  
303 2015;37:799-807.
- 304 [108] Wong JJ, Cote P, Shearer HM, Carroll LJ, Yu H, Varatharajan S, et al. Clinical practice  
305 guidelines for the management of conditions related to traffic collisions: a systematic review  
306 by the OPTIMa Collaboration. *Disabil Rehabil.* 2015;37:471-89.
- 307 [109] Wu AM, Wu CM, Young BK, Wu DJ, Chen A, Margo CE, et al. Evaluation of primary  
308 open-angle glaucoma clinical practice guidelines. *Can J Ophthalmol.* 2015;50:192-6.
- 309 [110] Wu AM, Wu CM, Young BK, Wu DJ, Margo CE, Greenberg PB. Critical appraisal of  
310 clinical practice guidelines for age-related macular degeneration. *J Ophthalmol.*  
311 2015;2015:710324.
- 312 [111] Wu CM, Wu AM. An evaluation of cataract surgery clinical practice guidelines. *Br J*  
313 *Ophthalmol.* 2015;99:401-4.
- 314 [112] Wu CM, Wu AM, Young BK, Wu DJ, Margo CE, Greenberg PB. An appraisal of  
315 clinical practice guidelines for diabetic retinopathy. *Am J Med Qual.* 05.03.2015 [Epub ahead  
316 of print].
- 317 [113] Yaman ME, Gudeloglu A, Senturk S, Yaman ND, Tolunay T, Ozturk Y, et al. A critical  
318 appraisal of the North American Spine Society guidelines with the Appraisal of Guidelines  
319 for Research and Evaluation II instrument. *Spine J.* 2015;15:777-81.
- 320 [114] Yan J, Min J, Zhou B. Diagnosis of pheochromocytoma: a clinical practice guideline  
321 appraisal using AGREE II instrument. *J Eval Clin Pract.* 2013;19:626-32.
- 322 [115] Ye ZK, Li C, Zhai SD. Guidelines for therapeutic drug monitoring of vancomycin: a  
323 systematic review. *PLoS One.* 2014;9:e99044.
- 324 [116] Yuwen Y, Shi NN, Han XJ, Gao Y, Xu JL, Liu DS, et al. Appraisal of clinical practice  
325 guidelines for ischemic stroke management in Chinese medicine with appraisal of guidelines  
326 for research and evaluation instrument: a systematic review. *Chin J Integr Med.* 2015;21:707-  
327 15.

- 328 [117] Zeng L, Zhang L, Hu Z, Ehle EA, Chen Y, Liu L, et al. Systematic review of evidence-  
329 based guidelines on medication therapy for upper respiratory tract infection in children with  
330 AGREE instrument. PLoS One. 2014;9:e87711.
- 331 [118] Zhang Z, Guo J, Su G, Li J, Wu H, Xie X. Evaluation of the quality of guidelines for  
332 myasthenia gravis with the AGREE II instrument. PLoS One. 2014;9:e111796.
- 333
