# Supplementary material for: Guideline appraisal with AGREE II: Systematic review of the current evidence on how users handle the 2 overall assessments
Source: PubMed Central journal article supplement (PMC5373625; doi:10.1371/journal.pone.0174831), 2017-03-30
Supplement: pone.0174831.s003.pdf [file pone.0174831.s003.pdf]

1 **S3: Publications excluded (organized by reasons for exclusion)**

2 **No results of appraisal with AGREE II**

- 3 [1] Aarts MCJ, Van der Heijden GJM, Rovers MM, Grolman W. Remarkable differences  
4 between three evidence-based guidelines on management of obstructive sleep apnea-  
5 hypopnea syndrome. *Laryngoscope*. 2013;123:283-91.
- 6 [2] Aass Y, McConnell H, Perrier L, Woodbury MG, Sibbald RG. Process for developing  
7 evidence-informed practice recommendations: venous leg ulcer example. *Advances in Skin &*  
8 *Wound Care*. 2009;22:133-40.
- 9 [3] Abarshi E, Rietjens J, Caraceni A, Payne S, Deliens L, Van den Block L. Towards a  
10 standardised approach for evaluating guidelines and guidance documents on palliative  
11 sedation: study protocol. *BMC Palliat Care*. 2014;13:34.
- 12 [4] Aboulsoud S, Huckson S, Wyer P, Lang E. Survey of preferred guideline attributes: what  
13 helps to make guidelines more useful for emergency health practitioners? *Int J Emerg Med*.  
14 2012;5:42.
- 15 [5] Ahmed AI, Soliman SM, Awad LA. Validation of evidence-based clinical practice  
16 guideline: nursing intervention for newly diagnosed pulmonary tuberculosis patients at  
17 community setting. *Alexandria Journal of Medicine*. 2012;48:155-65.
- 18 [6] Alonso-Coello P, Irfan A, Sola I, Gich I, Delgado-Noguera M, Rigau D, et al. The quality  
19 of clinical practice guidelines over the last two decades: a systematic review of guideline  
20 appraisal studies. *Qual Saf Health Care*. 2010;19:e58.
- 21 [7] Arbour-Nicitopoulos KP, Martin Ginis KA, Latimer-Cheung AE, Bourne C, Campbell D,  
22 Cappe S, et al. Development of an evidence-informed leisure time physical activity resource  
23 for adults with spinal cord injury: the SCI Get Fit Toolkit. *Spinal Cord*. 2013;51:491-500.
- 24 [8] Armstrong D, Barkun A, Bridges R, Carter R, De Gara C, Dube C, et al. Canadian  
25 Association of Gastroenterology consensus guidelines on safety and quality indicators in  
26 endoscopy. *Can J Gastroenterol*. 2012;26:17-31.
- 27 [9] Aus G, Chapple C, Hanus T, Irani J, Lobel B, Loch T, et al. The European Association of  
28 Urology (EAU) guidelines methodology: a critical evaluation. *Eur Urol*. 2009;56:859-64.
- 29 [10] Azermai M, Petrovic M, Elseviers MM, Bourgeois J, Van Bortel LM, Van der Stichele  
30 RH. Systematic appraisal of dementia guidelines for the management of behavioural and  
31 psychological symptoms. *Ageing Res Rev*. 2012;11:78-86.
- 32 [11] Bancos I, Cheng T, Prokop LJ, Montori VM, Murad MH. Endocrine clinical practice  
33 guidelines in North America: a systematic assessment of quality. *J Clin Epidemiol*.  
34 2012;65:520-5.
- 35 [12] Barajas-Nava L, Sola I, Delgado-Noguera M, Gich I, Orrego Villagran C, Bonfill X, et  
36 al. Quality assessment of clinical practice guidelines in perioperative care: a systematic  
37 appraisal. *Qual Saf Health Care*. 2010;19:e50.

- 38 [13] Barclay CA, Vonderhaar KJ, Clark EA. The development of evidence-based care  
39 recommendations to improve the safe use of anticoagulants in children. *J Pediatr Pharmacol*  
40 *Ther.* 2012;17:155-8.
- 41 [14] Barkun AN, Bardou M, Kuipers EJ, Sung J, Hunt RH, Martel M, et al. International  
42 consensus recommendations on the management of patients with nonvariceal upper  
43 gastrointestinal bleeding. *Ann Intern Med.* 2010;152:101-13.
- 44 [15] Batabyal P, Chapman JR, Wong G, Craig JC, Tong A. Clinical practice guidelines on  
45 wait-listing for kidney transplantation: consistent and equitable? *Transplantation.*  
46 2012;94:703-13.
- 47 [16] Becker WJ, Findlay T, Moga C, Scott NA, Harstall C, Taenzer P. Guideline for primary  
48 care management of headache in adults. *Can Fam Physician.* 2015;61:670-9.
- 49 [17] Bennett WL, Odelola OA, Wilson LM, Bolen S, Selvaraj S, Robinson KA, et al.  
50 Evaluation of guideline recommendations on oral medications for type 2 diabetes mellitus: a  
51 systematic review. *Ann Intern Med.* 2012;156:27-36.
- 52 [18] Berrigan L, Marshall S, McCullagh S, Velikonja D, Bayley M. Quality of clinical  
53 practice guidelines for persons who have sustained mild traumatic brain injury. *Brain Inj.*  
54 2011;25:742-51.
- 55 [19] Bouwmeester W, Van Enst A, Van Tulder M. Quality of low back pain guidelines  
56 improved. *Spine.* 2009;34:2562-7.
- 57 [20] Brosseau L. Ottawa panel evidence-based clinical practice guidelines for patient  
58 education programmes in the management of osteoarthritis. *Health Educ J.* 2011;70:318-58.
- 59 [21] Brouwers MC, Kho ME, Browman GP, Burgers JS, Cluzeau F, Feder G, et al.  
60 Development of the AGREE II, part 1: performance, usefulness and areas for improvement.  
61 *CMAJ.* 2010;182:1045-52.
- 62 [22] Brozek J, Jankowski M, Placzekiewicz-Jankowska E, Jaeschke R. International Diabetes  
63 Federation document concerning postmeal glycemic control: assessment of quality of clinical  
64 practice guidelines using AGREE instrument. *Pol Arch Med Wewn.* 2009;119:18-24.
- 65 [23] Burda BU, Norris SL, Holmer HK, Ogden LA, Smith MEB. Quality varies across  
66 clinical practice guidelines for mammography screening in women aged 40-49 years as  
67 assessed by AGREE and AMSTAR instruments. *J Clin Epidemiol.* 2011;64:968-76.
- 68 [24] Bush SH, Bruera E, Lawlor PG, Kanji S, Davis DH, Agar M, et al. Clinical practice  
69 guidelines for delirium management: potential application in palliative care. *J Pain Symptom*  
70 *Manage.* 2014;48:249-58.
- 71 [25] Canadian Agency for Drugs and Technologies in Health. Quality assessment of the  
72 Canadian Thoracic Society guidelines for sleep disordered breathing in adults. Ottawa:  
73 CADTH; 2009.

- 74 [26] Chen KH, Kao CC, Liu HE, Chiu WT, Kuo KN, Chen CC. Using appraisal of guidelines  
75 research and evaluation to appraise nursing clinical practice guidelines in Taiwan and to  
76 compare them to international studies. *J Exp Clin Med*. 2012;4:58-61.
- 77 [27] Cheng JS, Lee MJ, Massicotte E, Ashman B, Gruenberg M, Pilcher LE, et al. Clinical  
78 guidelines and payer policies on fusion for the treatment of chronic low back pain. *Spine*.  
79 2011;36:S144-S63.
- 80 [28] Chilibeck PD, Vatanparast H, Cornish SM, Abeysekara S, Charlesworth S. Evidence-  
81 based risk assessment and recommendations for physical activity: arthritis, osteoporosis, and  
82 low back pain. *Appl Physiol Nutr Metab*. 2011;36:S49-S79.
- 83 [29] Cornely OA, Cuenca-Estrella M, Meis JF, Ullmann AJ. European Society of Clinical  
84 Microbiology and Infectious Diseases (ESCMID) Fungal Infection Study Group (EFISG) and  
85 European Confederation of Medical Mycology (ECMM) 2013 joint guidelines on diagnosis  
86 and management of rare and emerging fungal diseases. *Clin Microbiol Infect*. 2014;20:1-4.
- 87 [30] Dagenais S, Tricco AC, Haldeman S. Synthesis of recommendations for the assessment  
88 and management of low back pain from recent clinical practice guidelines. *Spine J*.  
89 2010;10:514-29.
- 90 [31] De Boer WE, Bruinvels DJ, Rijkenberg AM, Donceel P, Anema JR. Evidence-based  
91 guidelines in the evaluation of work disability: an international survey and a comparison of  
92 quality of development. *BMC Public Health*. 2009;9:349.
- 93 [32] De Castro Maymone MB, Gan SD, Bigby M. Evaluating the strength of clinical  
94 recommendations in the medical literature: GRADE, SORT, and AGREE. *J Invest Dermatol*.  
95 2014;134:e25.
- 96 [33] De Hert M, Vancampfort D, Correll CU, Mercken V, Peuskens J, Sweers K, et al.  
97 Guidelines for screening and monitoring of cardiometabolic risk in schizophrenia: systematic  
98 evaluation. *Br J Psychiatry*. 2011;199:99-105.
- 99 [34] De Visschere LMJ, Van der Putten GJ, Vanobbergen JNO, Schols JMGA, De Baat C. An  
100 oral health care guideline for institutionalised older people. *Gerodontology*. 2011;28:307-10.
- 101 [35] De Weggheleire A, Bortolotti V, Zolfo M, Crowley S, Colebunders R, Riedner G, et al.  
102 Challenges in developing national HIV guidelines: experience from the eastern  
103 Mediterranean. *Bull World Health Organ*. 2011;89:442-50.
- 104 [36] Debourdeau P, Beckers M, Gerome P, Durant C, Lacoïn Q, Debourdeau A, et al. How to  
105 improve the implementation of guidelines on cancer-related thrombosis. *Expert Rev*  
106 *Anticancer Ther*. 2011;11:473-83.
- 107 [37] Delgado-Noguera M, Tort S, Bonfill X, Gich I, Alonso-Coello P. Quality assessment of  
108 clinical practice guidelines for the prevention and treatment of childhood overweight and  
109 obesity. *Eur J Pediatr*. 2009;168:789-99.

- 110 [38] Dinnes J, Hewison J, Altman DG, Deeks JJ. The basis for monitoring strategies in  
111 clinical guidelines: a case study of prostate-specific antigen for monitoring in prostate cancer.  
112 CMAJ. 2012;184:169-77.
- 113 [39] Ebrahimipour H, Mirfeizi SZ, Najar AV, Kachooei AR, Ariamanesh AS, Ganji R, et al.  
114 Developing an appropriateness criteria for knee MRI using the Rand Appropriateness Method  
115 (RAM) 2013. Arch Bone Jt Surg. 2014;2:47-51.
- 116 [40] Eldh AC, Vogel G, Söderberg A, Blomqvist H, Wengström Y. Use of evidence in  
117 clinical guidelines and everyday practice for mechanical ventilation in Swedish intensive care  
118 units. Worldviews Evid Based Nurs. 2013;10:198-207.
- 119 [41] Espirito Santo A, Choquette A. Experience of adapting and implementing an evidence-  
120 based nursing guideline for prevention of diaper dermatitis in a paediatric oncology setting.  
121 Int J Evid Based Healthc. 2013;11:121-7.
- 122 [42] Ferket BS, Genders TSS, Colkesen EB, Visser JJ, Spronk S, Steyerberg EW, et al.  
123 Systematic review of guidelines on imaging of asymptomatic coronary artery disease. J Am  
124 Coll Cardiol. 2011;57:1591-600.
- 125 [43] Ferket BS, Grootenboer N, Colkesen EB, Visser JJ, Van Sambeek MRHM, Spronk S, et  
126 al. Systematic review of guidelines on abdominal aortic aneurysm screening. J Vasc Surg.  
127 2012;55:1296-304.
- 128 [44] Ferket BS, Spronk S, Colkesen EB, Hunink MGM. Systematic review of guidelines on  
129 peripheral artery disease screening. Am J Med. 2012;125.
- 130 [45] Fitzgerald RC, Di Pietro M, Ragnath K, Ang Y, Kang JY, Watson P, et al. British  
131 Society of Gastroenterology guidelines on the diagnosis and management of Barrett's  
132 oesophagus. Gut. 2014;63:7-42.
- 133 [46] Floor-Schreudering A, De Smet PAGM, Buurma H, Amini S, Bouvy ML. Clarity and  
134 applicability of drug-drug interaction management guidelines: a systematic appraisal by  
135 general practitioners and community pharmacists in the Netherlands. Drug Saf. 2011;34:683-  
136 90.
- 137 [47] Fortin M, Contant E, Savard C, Hudon C, Poitras ME, Almirall J. Canadian guidelines  
138 for clinical practice: an analysis of their quality and relevance to the care of adults with  
139 comorbidity. BMC Fam Pract. 2011;12:74.
- 140 [48] Foureur M, Ryan CL, Nicholl M, Homer C. Inconsistent evidence: analysis of six  
141 national guidelines for vaginal birth after cesarean section. Birth. 2010;37:3-10.
- 142 [49] Gaebel W, Riesbeck M, Wobrock T. Schizophrenia guidelines across the world: a  
143 selective review and comparison. Int Rev Psychiatry. 2011;23:379-87.
- 144 [50] Gallardo CR, Rigau D, Irfan A, Ferrer A, Cayla JA, Bonfill X, et al. Quality of  
145 tuberculosis guidelines: urgent need for improvement. Int J Tuberc Lung Dis. 2010;14:1045-  
146 51.

- 147 [51] Genovesi D, Mazzilli L, Trignani M, Di Tommaso M, Nuzzo A, Biondi E, et al.  
148 Developing a decision-making model based on an interdisciplinary oncological care group for  
149 the management of colorectal cancer. *Anticancer Res.* 2014;34:2525-31.
- 150 [52] Giannattasio A, Lo Vecchio A, Albano F, Giacomet V, Barbarino A, Guarino A. Flu and  
151 pneumococcal immunisations in HIV-infected children: methodological quality of current  
152 recommendations. *BMJ Qual Saf.* 2011;20:432-9.
- 153 [53] Ginis KAM, Hicks AL, Latimer AE, Warburton DER, Bourne C, Ditor DS, et al. The  
154 development of evidence-informed physical activity guidelines for adults with spinal cord  
155 injury. *Spinal Cord.* 2011;49:1088-96.
- 156 [54] Glenny AM, Worthington HV, Clarkson JE, Esposito M. The appraisal of clinical  
157 guidelines in dentistry. *Eur J Oral Implantol.* 2009;2:135-43.
- 158 [55] Goergen SK, Rumbold G, Compton G, Harris C. Systematic review of current  
159 guidelines, and their evidence base, on risk of lactic acidosis after administration of contrast  
160 medium for patients receiving metformin. *Radiology.* 2010;254:261-9.
- 161 [56] Gopalakrishna G, Langendam MW, Scholten RJPM, Bossuyt PMM, Leeflang MMG.  
162 Guidelines for guideline developers: a systematic review of grading systems for medical tests.  
163 *Implement Sci.* 2013;8:78.
- 164 [57] Gorman SK, Chung MH, Slavik RS, Zed PJ, Wilbur K, Dhingra VK. A critical appraisal  
165 of the quality of critical care pharmacotherapy clinical practice guidelines and their strength  
166 of recommendations. *Intensive Care Med.* 2010;36:1636-43.
- 167 [58] Green E, Zwaal C, Beals C, Fitzgerald B, Harle I, Jones J, et al. Cancer-related pain  
168 management: a report of evidence-based recommendations to guide practice. *Clin J Pain.*  
169 2010;26:449-62.
- 170 [59] Greuter MJE, Van Emmerik NMA, Wouters MGAJ, Van Tulder MW. Quality of  
171 guidelines on the management of diabetes in pregnancy: a systematic review. *BMC*  
172 *Pregnancy Childbirth.* 2012;12:58.
- 173 [60] Gupta S, Bhattacharyya OK, Brouwers MC, Estey EA, Harrison MB, Hernandez P, et al.  
174 Canadian Thoracic Society: presenting a new process for clinical practice guideline  
175 production. *Can Respir J.* 2009;16:e62-e8.
- 176 [61] Häberle J, Huemer M. Evaluation of implementation, adaptation and use of the recently  
177 proposed urea cycle disorders guidelines. *JIMD Rep.* 2015;21:65-70.
- 178 [62] Harris MF, Bailey L, Snowdon T, Litt J, Smith JW, Joyner B, et al. Developing the  
179 guidelines for preventive care: two decades of experience. *Aust Fam Physician.* 2010;39:63-5.
- 180 [63] Hegarty K, Gunn J, Blashki G, Griffiths F, Dowell T, Kendrick T. How could depression  
181 guidelines be made more relevant and applicable to primary care? A quantitative and  
182 qualitative review of national guidelines. *Br J Gen Pract.* 2009;59:e149-e56.

- 183 [64] Hester G, Nelson K, Mahant S, Eresuma E, Keren R, Srivastava R. Methodological  
184 quality of national guidelines for pediatric inpatient conditions. *J Hosp Med.* 2014;9:384-90.
- 185 [65] Hogeveen SE, Han D, Trudeau-Tavara S, Buck J, Brezden-Masley CB, Quan ML, et al.  
186 Comparison of international breast cancer guidelines: are we globally consistent? *Cancer*  
187 *guideline AGREEMENT.* *Curr Oncol.* 2012;19:e184-e90.
- 188 [66] Hopayian K, Jackson L. Evaluation of the methodological quality of the Health  
189 Protection Agency's 2009 guidance on neuraminidase inhibitors. *Qual Prim Care.* 2012;20:69-  
190 75.
- 191 [67] Horiuchi S, Yaju Y, Kataoka Y, Grace Eto H, Matsumoto N. Development of an  
192 evidence-based domestic violence guideline: supporting perinatal women-centred care in  
193 Japan. *Midwifery.* 2009;25:72-8.
- 194 [68] Hu J, Chen R, Wu S, Tang J, Leng G, Kunnamo I, et al. The quality of clinical practice  
195 guidelines in China: a systematic assessment. *J Eval Clin Pract.* 2013;19:961-7.
- 196 [69] Hurkmans EJ, Jones A, Li LC, Vliet Vlieland TPM. Quality appraisal of clinical practice  
197 guidelines on the use of physiotherapy in rheumatoid arthritis: a systematic review.  
198 *Rheumatology (Oxford).* 2011;50:1879-88.
- 199 [70] Irani S, Rashidian A, Yousefi-Nooraie R, Soltani A. Evaluating clinical practice  
200 guidelines developed for the management of thyroid nodules and thyroid cancers and  
201 assessing the reliability and validity of the AGREE instrument. *J Eval Clin Pract.*  
202 2011;17:729-36.
- 203 [71] Irving G, Holden J, Edwards J, Reeve J, Dowrick C, Lloyd-Williams M. Chronic heart  
204 failure guidelines: do they adequately address patient need at the end-of-life? *Int J Cardiol.*  
205 2013;168:2304-9.
- 206 [72] Jamnik VK, Warburton DER, Makarski J, McKenzie DC, Shephard RJ, Stone JA, et al.  
207 Enhancing the effectiveness of clearance for physical activity participation: background and  
208 overall process. *Appl Physiol Nutr Metab.* 2011;36:S3-S13.
- 209 [73] Jarrett M. Use of clinical practice guidelines to promote best practice when managing  
210 clinical interventions for liver transplant candidates. *Prog Transplant.* 2009;19:132-40.
- 211 [74] Jo MW, Lee JY, Kim NS, Kim SY, Sheen S, Kim SH, et al. Assessment of the quality of  
212 clinical practice guidelines in Korea using the AGREE Instrument. *J Korean Med Sci.*  
213 2013;28:357-65.
- 214 [75] Johnstone DE, Buller CE. Pan-Canadian cardiovascular data definitions and quality  
215 indicators: a status update. *Can J Cardiol.* 2012;28:599-601.
- 216 [76] Kahn SE, Astles JR, Lo SF, Bennett MJ. The AGREE II instrument is helpful for  
217 creation of National Academy of Clinical Biochemistry laboratory medicine practice  
218 guidelines. *Clin Chem.* 2013;59:446-7.

- 219 [77] Karamustafalioglu O. Major depressive disorder, mental health care, and the use of  
220 guidelines in the Middle East. *J Clin Psychiatry*. 2010;71:e07.
- 221 [78] Kesaniemi A, Riddoch CJ, Reeder B, Blair SN, Sorensen TIA. Advancing the future of  
222 physical activity guidelines in Canada: an independent expert panel interpretation of the  
223 evidence. *Int J Behav Nutr Phys Act*. 2010;7:41.
- 224 [79] Kinnunen-Amoroso M, Pasternack I, Mattila S, Parantainen A. Evaluation of the practice  
225 guidelines of Finnish Institute of Occupational Health with AGREE instrument. *Ind Health*.  
226 2009;47:689-93.
- 227 [80] Kis E, Szegedi I, Dobos E, Nagy E, Boda K, Kemeny L, et al. Quality assessment of  
228 clinical practice guidelines for adaptation in burn injury. *Burns*. 2010;36:606-15.
- 229 [81] Knai C, Brusamento S, Legido-Quigley H, Saliba V, Panteli D, Turk E, et al. Systematic  
230 review of the methodological quality of clinical guideline development for the management of  
231 chronic disease in Europe. *Health Policy*. 2012;107:157-67.
- 232 [82] La Chapelle CF, Bemelman WA, Rademaker BMP, Van Barneveld TA, Jansen FW. A  
233 multidisciplinary evidence-based guideline for minimally invasive surgery part 1: entry  
234 techniques and the pneumoperitoneum. *Gynecol Surg*. 2012;9:271-82.
- 235 [83] Latimer-Cheung AE, Martin Ginis KA, Hicks AL, Motl RW, Pilutti LA, Duggan M, et  
236 al. Development of evidence-informed physical activity guidelines for adults with multiple  
237 sclerosis. *Arch Phys Med Rehabil*. 2013;94.
- 238 [84] Lau CS, Chia F, Harrison A, Hsieh TY, Jain R, Jung SM, et al. APLAR rheumatoid  
239 arthritis treatment recommendations. *Int J Rheum Dis*. 2015;18:685-713.
- 240 [85] Lavergne V, Nolin TD, Hoffman RS, Roberts D, Gosselin S, Goldfarb DS, et al. The  
241 EXTRIP (EXtracorporeal TReatments In Poisoning) workgroup: guideline methodology. *Clin*  
242 *Toxicol*. 2012;50:403-13.
- 243 [86] Leach MJ, Segal L. Are clinical practical guidelines (CPGs) useful for health services  
244 and health workforce planning? A critique of diabetes CPGs. *Diabet Med*. 2010;27:570-7.
- 245 [87] Legido-Quigley H, Panteli D, Brusamento S, Knai C, Saliba V, Turk E, et al. Clinical  
246 guidelines in the European Union: mapping the regulatory basis, development, quality  
247 control, implementation and evaluation across member states. *Health Policy*. 2012;107:146-  
248 56.
- 249 [88] Lepanto L, Tang A, Murphy-Lavallee J, Billiard JS. The Canadian Association of  
250 Radiologists guidelines for the prevention of contrast-induced nephropathy: a critical  
251 appraisal. *Can Assoc Radiol J*. 2011;62:238-42.
- 252 [89] Levin RF, Ferrara L. Using the Appraisal of Guidelines for Research and Evaluation II to  
253 assess clinical practice guidelines. *Res Theory Nurs Pract*. 2011;25:160-2.

- 254 [90] Li-Yu J, Perez EC, Canete A, Bonifacio L, Llamado LQ, Martinez R, et al. Consensus  
255 statements on osteoporosis diagnosis, prevention, and management in the Philippines. *Int J*  
256 *Rheum Dis*. 2011;14:223-38.
- 257 [91] Lo Vecchio A, Giannattasio A, Duggan C, De Masi S, Ortisi MT, Parola L, et al.  
258 Evaluation of the quality of guidelines for acute gastroenteritis in children with the AGREE  
259 instrument. *J Pediatr Gastroenterol Nutr*. 2011;52:183-9.
- 260 [92] Loew L, Brosseau L, Wells GA, Tugwell P, Kenny GP, Reid R, et al. Ottawa panel  
261 evidence-based clinical practice guidelines for aerobic walking programs in the management  
262 of osteoarthritis. *Arch Phys Med Rehabil*. 2012;93:1269-85.
- 263 [93] Lopez-Medrano F, Cordero E, Gavalda J, Cruzado JM, Marcos MA, Perez-Romero P, et  
264 al. Management of influenza infection in solid-organ transplant recipients: consensus  
265 statement of the Group for the Study of Infection in Transplant Recipients (GESITRA) of the  
266 Spanish Society of Infectious Diseases and Clinical Microbiology (SEIMC) and the Spanish  
267 Network for Research in Infectious Diseases (REIPI). *Enferm Infecc Microbiol Clin*. 2013;31.
- 268 [94] Loveday BPT, Srinivasa S, Vather R, Mittal A, Petrov MS, Phillips ARJ, et al. High  
269 quantity and variable quality of guidelines for acute pancreatitis: a systematic review. *Am J*  
270 *Gastroenterol*. 2010;105:1466-76.
- 271 [95] Lu Y, Carey S. Translating evidence-based practice guidelines into a summary of  
272 recommendations for the nutrition management of upper gastrointestinal cancers. *Nutr Clin*  
273 *Pract*. 2014;29:518-25.
- 274 [96] Mahmud M, Mazza D. Preconception care of women with diabetes: a review of current  
275 guideline recommendations. *BMC Womens Health*. 2010;10:5.
- 276 [97] Mar Segui MD, Ronda E, Wimpenny P. Inconsistencies in guidelines for visual health  
277 surveillance of VDT workers. *J Occup Health*. 2012;54:16-24.
- 278 [98] Mathur S, Conway DI, Worlledge-Andrew H, Macpherson LMD, Ross AJ. Assessment  
279 and prevention of behavioural and social risk factors associated with oral cancer: protocol for  
280 a systematic review of clinical guidelines and systematic reviews to inform primary care  
281 dental professionals. *Syst Rev*. 2015;4:184.
- 282 [99] Matthews DC. Prevention and treatment of periodontal diseases in primary care. *Evid*  
283 *Based Dent*. 2014;15:68-9.
- 284 [100] Maxwell AP. Diagnosis and management of hyponatraemia: AGREEing the guidelines.  
285 *BMC Med*. 2015;13:31.
- 286 [101] McNair RP, Hegarty K. Guidelines for the primary care of lesbian, gay, and bisexual  
287 people: a systematic review. *Ann Fam Med*. 2010;8:533-41.
- 288 [102] Meuffels DE, Poldervaart MT, Diercks RL, Fievez AWF, Patt TW, Van der Hart CP,  
289 et al. Guideline on anterior cruciate ligament injury. *Acta Orthop*. 2012;83:379-86.



- 290 [103] Muraro A, Dubois AEJ, Dunngalvin A, Hourihane JO, De Jong NW, Meyer R, et al.  
291 EAACI food allergy and anaphylaxis guidelines: food allergy health-related quality of life  
292 measures. *Allergy*. 2014;69:845-53.
- 293 [104] Muth C, Gensichen J, Beyer M, Hutchinson A, Gerlach FM. The systematic guideline  
294 review: method, rationale, and test on chronic heart failure. *BMC Health Serv Res*. 2009;9:74.
- 295 [105] Nast A, Spuls PH, Ormerod AD, Reytan N, Saiag PH, Smith CH, et al. A critical  
296 appraisal of evidence-based guidelines for the treatment of psoriasis vulgaris: 'AGREE-ing' on  
297 a common base for European evidence-based psoriasis treatment guidelines. *J Eur Acad*  
298 *Dermatol Venereol*. 2009;23:782-7.
- 299 [106] Ostovar R, Pourreza A, Rashidian A, Rashidi BH, Hantooshzadeh S, Haghollai F, et al.  
300 Appropriateness of cesarean sections using the RAND Appropriateness Method criteria. *Arch*  
301 *Iran Med*. 2012;15:8-13.
- 302 [107] Ou Y, Goldberg I, Migdal C, Lee PP. A critical appraisal and comparison of the quality  
303 and recommendations of glaucoma clinical practice guidelines. *Ophthalmology*.  
304 2011;118:1017-23.
- 305 [108] Parnell C, Whelton H, O'Mullane D. Water fluoridation. *Eur Arch Paediatr Dent*.  
306 2009;10:141-8.
- 307 [109] Patel ZM, Kennedy DW, Setzen M, Poetker DM, DelGaudio JM. "Sinus headache":  
308 rhinogenic headache or migraine? An evidence-based guide to diagnosis and treatment. *Int*  
309 *Forum Allergy Rhinol*. 2013;3:221-30.
- 310 [110] Patel ZM, Setzen M, Sclafani AP, Del Gaudio JM. Concurrent functional endoscopic  
311 sinus surgery and septorhinoplasty: using evidence to make clinical decisions. *Int Forum*  
312 *Allergy Rhinol*. 2013;3:488-92.
- 313 [111] Pillastrini P, Gardenghi I, Bonetti F, Capra F, Guccione A, Mugnai R, et al. An updated  
314 overview of clinical guidelines for chronic low back pain management in primary care. *Joint*  
315 *Bone Spine*. 2012;79:176-85.
- 316 [112] Poetker DM, Jakubowski LA, Lal D, Hwang PH, Wright ED, Smith TL. Oral  
317 corticosteroids in the management of adult chronic rhinosinusitis with and without nasal  
318 polyyps: an evidence-based review with recommendations. *Int Forum Allergy Rhinol*.  
319 2013;3:104-20.
- 320 [113] Pool F, Goergen S. Quality of the written radiology report: a review of the literature. *J*  
321 *Am Coll Radiol*. 2010;7:634-43.
- 322 [114] Potting C, Mistiaen P, Poot E, Blijlevens N, Donnelly P, Van Achterberg T. A review  
323 of quality assessment of the methodology used in guidelines and systematic reviews on oral  
324 mucositis. *J Clin Nurs*. 2009;18:3-12.

325 [115] Qaseem A, Snow V, Shekelle P, Hopkins R Jr, Owens DK. Screening for HIV in health  
326 care settings: a guidance statement from the American College of Physicians and HIV  
327 Medicine Association. *Ann Intern Med.* 2009;150:125-31.

328 [116] Ramakrishnan VR, Orlandi RR, Citardi MJ, Smith TL, Fried MP, Kingdom TT. The  
329 use of image-guided surgery in endoscopic sinus surgery: an evidence-based review with  
330 recommendations. *Int Forum Allergy Rhinol.* 2013;3:236-41.

331 [117] Ring J, Alomar A, Bieber T, Deleuran M, Fink-Wagner A, Gelmetti C, et al. Guidelines  
332 for treatment of atopic eczema (atopic dermatitis) part I. *J Eur Acad Dermatol Venereol.*  
333 2012;26:1045-60.

334 [118] Ring J, Alomar A, Bieber T, Deleuran M, Fink-Wagner A, Gelmetti C, et al. Guidelines  
335 for treatment of atopic eczema (atopic dermatitis) part II. *J Eur Acad Dermatol Venereol.*  
336 2012;26:1176-93.

337 [119] Rodin G, Mackay JA, Zimmermann C, Mayer C, Howell D, Katz M, et al. Clinician-  
338 patient communication: a systematic review. *Support Care Cancer.* 2009;17:627-44.

339 [120] Rowe RE. Local guidelines for the transfer of women from midwifery unit to obstetric  
340 unit during labour in England: a systematic appraisal of their quality. *Qual Saf Health Care.*  
341 2010;19:90-4.

342 [121] Rudmik L, Soler ZM, Orlandi RR, Stewart MG, Bhattacharyya N, Kennedy DW, et al.  
343 Early postoperative care following endoscopic sinus surgery: an evidence-based review with  
344 recommendations. *Int Forum Allergy Rhinol.* 2011;1:417-30.

345 [122] Rutter MD, Chattree A, Barbour JA, Thomas-Gibson S, Bhandari P, Saunders BP, et al.  
346 British Society of Gastroenterology/Association of Coloproctologists of Great Britain and  
347 Ireland guidelines for the management of large non-pedunculated colorectal polyps. *Gut.*  
348 2015;64:1847-73.

349 [123] Sampson EL, Van der Steen JT, Pautex S, Svartzman P, Sacchi V, Van den Block L, et  
350 al. European palliative care guidelines: how well do they meet the needs of people with  
351 impaired cognition? *BMJ Support Palliat Care.* 2015;5:301-5.

352 [124] Santaguida PL, Keshavarz H, Carlesso LC, Lomotan M, Gross A, Macdermid JC, et al.  
353 A description of the methodology used in an overview of reviews to evaluate evidence on the  
354 treatment, harms, diagnosis/classification, prognosis and outcomes used in the management of  
355 neck pain. *Open Orthop J.* 2013;7:461-72.

356 [125] Schmidt S, Follmann M, Malek N, Manns MP, Greten TF. Critical appraisal of clinical  
357 practice guidelines for diagnosis and treatment of hepatocellular carcinoma. *J Gastroenterol*  
358 *Hepatol.* 2011;26:1779-86.

359 [126] Schofield P, Sofaer-Bennett B, Hadjistavropoulos T, Zwakhalen S, Brown C,  
360 Westerling D, et al. A collaborative expert literature review of pain education, assessment and  
361 management. *Aging health.* 2012;8:43-54.

- 362 [127] Seixas M, Weiss M, Muller U. Systematic review of national and international  
363 guidelines on attention-deficit hyperactivity disorder. *J Psychopharmacol (Oxf)*. 2012;26:753-  
364 65.
- 365 [128] Serrano-Aguilar P, Kovacs FM, Cabrera-Hernandez JM, Ramos-Goni JM, Garcia-Perez  
366 L. Avoidable costs of physical treatments for chronic back, neck and shoulder pain within the  
367 Spanish National Health Service: a cross-sectional study. *BMC Musculoskelet Disord*.  
368 2011;12:287.
- 369 [129] Sevrain M, Villani AP, Rouzaud M, Barnetche T, Paul C, Richard MA, et al. Treatment  
370 (biotherapy excluded) of psoriatic arthritis: an appraisal of methodological quality of  
371 international guidelines. *J Eur Acad Dermatol Venereol*. 2014;28:33-9.
- 372 [130] Shah P, Moles DR, Parekh S, Ashley P, Siddik D. Evaluation of pediatric dentistry  
373 guidelines using the AGREE instrument. *Pediatr Dent*. 2011;33:120-9.
- 374 [131] Shimbo T, Fukui T, Ishioka C, Okamoto K, Okamoto T, Kameoka S, et al. Quality of  
375 guideline development assessed by the Evaluation Committee of the Japan Society of Clinical  
376 Oncology. *Int J Clin Oncol*. 2010;15:227-33.
- 377 [132] Shinohara Y, Nagayama M, Origasa H. Postpublication external review of the Japanese  
378 guidelines for the management of stroke 2004. *Stroke*. 2009;40:1439-43.
- 379 [133] Simone B, De Feo E, Nicolotti N, Ricciardi W, Boccia S. Methodological quality of  
380 English-language genetic guidelines on hereditary breast-cancer screening and management:  
381 an evaluation using the AGREE instrument. *BMC Med*. 2012;10:143.
- 382 [134] Simone B, De Feo E, Nicolotti N, Ricciardi W, Boccia S. Quality evaluation of  
383 guidelines on genetic screening, surveillance and management of hereditary colorectal cancer.  
384 *Eur J Public Health*. 2012;22:914-20.
- 385 [135] Simons MP, Aufenacker T, Bay-Nielsen M, Bouillot JL, Campanelli G, Conze J, et al.  
386 European Hernia Society guidelines on the treatment of inguinal hernia in adult patients.  
387 *Hernia*. 2009;13:343-403.
- 388 [136] Soler ZM, Oyer SL, Kern RC, Senior BA, Kountakis SE, Marple BF, et al.  
389 Antimicrobials and chronic rhinosinusitis with or without polyposis in adults: an evidenced-  
390 based review with recommendations. *Int Forum Allergy Rhinol*. 2013;3:31-47.
- 391 [137] Spence K, Henderson-Smart D, New K, Evans C, Whitelaw J, Woolnough R.  
392 Evidenced-based clinical practice guideline for management of newborn pain. *J Paediatr*  
393 *Child Health*. 2010;46:184-92.
- 394 [138] Spuls PI, Nast A. Evaluation of and perspectives on guidelines: what is important? *J*  
395 *Invest Dermatol*. 2010;130:2348-9.
- 396 [139] Stein DJ, Ipser J, McAnda N. Pharmacotherapy of posttraumatic stress disorder: a  
397 review of meta-analyses and treatment guidelines. *CNS Spectr*. 2009;14:25-31.

398 [140] Stergiou-Kita M, Dawson D, Rappolt S. Inter-professional clinical practice guideline  
399 for vocational evaluation following traumatic brain injury: a systematic and evidence-based  
400 approach. *J Occup Rehabil.* 2012;22:166-81.

401 [141] Stergiou-Kita M, Grigorovich A, Gomez M. Development of an inter-professional  
402 clinical practice guideline for vocational evaluation following severe burn. *Burns.*  
403 2014;40:1149-63.

404 [142] Stoffer MA, Smolen JS, Woolf A, Ambrozic A, Bosworth A, Carmona L, et al.  
405 Development of patient-centred standards of care for rheumatoid arthritis in Europe: the  
406 eumusc.net project. *Ann Rheum Dis.* 2014;73:902-5.

407 [143] Stone MA, Wilkinson JC, Charpentier G, Clochard N, Grassi G, Lindblad U, et al.  
408 Evaluation and comparison of guidelines for the management of people with type 2 diabetes  
409 from eight European countries. *Diabetes Res Clin Pract.* 2010;87:252-60.

410 [144] Strech D, Schildmann J. Quality of ethical guidelines and ethical content in clinical  
411 guidelines: the example of end-of-life decision-making. *J Med Ethics.* 2011;37:390-6.

412 [145] Takeuchi H, Saeki T, Aiba K, Tamura K, Aogi K, Eguchi K, et al. Japanese Society of  
413 Clinical Oncology clinical practice guidelines 2010 for antiemesis in oncology: executive  
414 summary. *Int J Clin Oncol.* 2016;21:1-12.

415 [146] Tan JKL, Wolfe BJ, Bulatovic R, Jones EB, Lo AY. Critical appraisal of quality of  
416 clinical practice guidelines for treatment of psoriasis vulgaris, 2006-2009. *J Invest Dermatol.*  
417 2010;130:2389-95.

418 [147] Tavender EJ, Bosch M, Green S, O'Connor D, Pitt V, Phillips K, et al. Quality and  
419 consistency of guidelines for the management of mild traumatic brain injury in the emergency  
420 department. *Acad Emerg Med.* 2011;18:880-9.

421 [148] Thomas SG, Goodman JM, Burr JF. Evidence-based risk assessment and  
422 recommendations for physical activity clearance: established cardiovascular disease. *Appl*  
423 *Physiol Nutr Metab.* 2011;36:S190-S213.

424 [149] Tong A, Chapman JR, Wong G, De Bruijn J, Craig JC. Screening and follow-up of  
425 living kidney donors: a systematic review of clinical practice guidelines. *Transplantation.*  
426 2011;92:962-72.

427 [150] Tremblay MS, Leblanc AG, Carson V, Choquette L, Connor Gorber S, Dillman C, et al.  
428 Canadian physical activity guidelines for the early years (aged 0-4 years). *Appl Physiol Nutr*  
429 *Metab.* 2012;37:345-69.

430 [151] Tremblay MS, Leblanc AG, Carson V, Choquette L, Connor Gorber S, Dillman C, et al.  
431 Canadian sedentary behaviour guidelines for the early years (aged 0-4 years). *Appl Physiol*  
432 *Nutr Metab.* 2012;37:370-91.

433 [152] Tremblay MS, Leblanc AG, Janssen I, Kho ME, Hicks A, Murumets K, et al. Canadian  
434 sedentary behaviour guidelines for children and youth. *Appl Physiol Nutr Metab.* 2011;36:59-  
435 64.

436 [153] Tremblay MS, Warburton DER, Janssen I, Paterson DH, Latimer AE, Rhodes RE, et al.  
437 New Canadian physical activity guidelines. *Appl Physiol Nutr Metab.* 2011;36:36-46.

438 [154] Tripathi D, Stanley AJ, Hayes PC, Patch D, Millson C, Mehrzad H, et al. U.K.  
439 guidelines on the management of variceal haemorrhage in cirrhotic patients. *Gut.*  
440 2015;64:1680-704.

441 [155] Tugwell P, Pottie K, Welch V, Ueffing E, Chambers A, Feightner J. Evaluation of  
442 evidence-based literature and formulation of recommendations for the clinical preventive  
443 guidelines for immigrants and refugees in Canada. *CMAJ.* 2011;183:E933-E8.

444 [156] Ullmann AJ, Cornely OA, Donnelly JP, Akova M, Arendrup MC, Arikan-Akdagli S, et  
445 al. ESCMID\* guideline for the diagnosis and management of *Candida* diseases 2012:  
446 developing European guidelines in clinical microbiology and infectious diseases. *Clin*  
447 *Microbiol Infect.* 2012;18:1-8.

448 [157] Unden J, Ingebrigtsen T, Romner B. Scandinavian guidelines for initial management of  
449 minimal, mild and moderate head injuries in adults: an evidence and consensus-based update.  
450 *BMC Med.* 2013;11:50.

451 [158] Van de Bovenkamp HM, Zuiderent-Jerak T. An empirical study of patient participation  
452 in guideline development: exploring the potential for articulating patient knowledge in  
453 evidence-based epistemic settings. *Health Expect.* 03.05.2013 [Epub ahead of print].

454 [159] Van de Velde S, Heselmans A, Donceel P, Vandekerckhove P, Ramaekers D,  
455 Aertgeerts B. Rigour of development does not AGREE with recommendations in practice  
456 guidelines on the use of ice for acute ankle sprains. *BMJ Qual Saf.* 2011;20:747-55.

457 [160] Van den Berg T, Engelhardt EG, Haanstra TM, Langius JAE, Van Tulder MW.  
458 Methodology of clinical nutrition guidelines for adult cancer patients: how good are they  
459 according to AGREE criteria? *JPEN J Parenter Enteral Nutr.* 2012;36:316-22.

460 [161] Van Diermen DE, Aartman IHA, Baart JA, Hoogstraten J, Van der Waal I. Dental  
461 management of patients using antithrombotic drugs: critical appraisal of existing guidelines.  
462 *Oral Surg Oral Med Oral Pathol Oral Radiol Endod.* 2009;107:616-24.

463 [162] Vancampfort D, Sweers K, Probst M, Mitchell AJ, Knapen J, De Hert M. Quality  
464 assessment of physical activity recommendations within clinical practice guidelines for the  
465 prevention and treatment of cardio-metabolic risk factors in people with schizophrenia.  
466 *Community Ment Health J.* 2011;47:703-10.

467 [163] Vasse E, Vernooij-Dassen M, Cantegreil I, Franco M, Dorenlot P, Woods B, et al.  
468 Guidelines for psychosocial interventions in dementia care: a European survey and  
469 comparison. *Int J Geriatr Psychiatry.* 2012;27:40-8.

470 [164] Warburton DER, Jamnik VK, Bredin SSD, McKenzie DC, Stone J, Shephard RJ, et al.  
471 Evidence-based risk assessment and recommendations for physical activity clearance: an  
472 introduction. *Appl Physiol Nutr Metab*. 2011;36:S1-S2.

473 [165] Warriner RA 3rd, Carter MJ. The current state of evidence-based protocols in wound  
474 care. *Plast Reconstr Surg*. 2011;127:144S-53S.

475 [166] Wens J, Van Royen P. Comment on: "Evaluation and comparison of guidelines for the  
476 management of people with type 2 diabetes from eight European countries" by Stone et al. on  
477 behalf of the GUIDANCE study group (*Diabetes Res Clin Pract* 2010; 87(2): 252-60).  
478 *Diabetes Res Clin Pract*. 2011;92:407-8.

479 [167] Wijkstra J, Schubart CD, Nolen WA. Treatment of unipolar psychotic depression: the  
480 use of evidence in practice guidelines. *World J Biol Psychiatry*. 2009;10:409-15.

481 [168] Wilson DC, Thomas AG, Croft NM, Newby E, Akobeng AK, Sawczenko A, et al.  
482 Systematic review of the evidence base for the medical treatment of paediatric inflammatory  
483 bowel disease. *J Pediatr Gastroenterol Nutr*. 2010;50:S14-S34.

484 [169] Wilson MG, Dickie M, Cooper CL, Carvalhal A, Bacon J, Rourke SB. Treatment, care  
485 and support for people co-infected with HIV and hepatitis C: a scoping review. *Open Med*.  
486 2009;3:e184-95.

487 [170] Wilting I, Egberts ACG, Heerdink ER, Ververs TFT, Meulenbelt J, Nolen WA.  
488 Evaluation of available treatment guidelines for the management of lithium intoxication. *Ther*  
489 *Drug Monit*. 2009;31:247-60.

490 [171] Winther LP, Mitchell AU, Moller AM. Inconsistencies in clinical guidelines for  
491 obstetric anaesthesia for Caesarean section: a comparison of the Danish, English, American,  
492 and German guidelines with regard to developmental quality and guideline content. *Acta*  
493 *Anaesthesiol Scand*. 2013;57:141-9.

494 [172] Wiseman R, Cohen K, Gray A, Jamaloodien K, Kredo T, Miot J, et al. AGREE to  
495 disagree: critical appraisal and the publication of practice guidelines. *S Afr Med J*.  
496 2014;104:345-6.

497 [173] Wright F, Spithoff K, Easson A, Murray C, Toye J, McCready D, et al. Primary  
498 excision margins and sentinel lymph node biopsy in clinically node-negative melanoma of the  
499 trunk or extremities. *Clin Oncol (R Coll Radiol)*. 2011;23:572-8.

500 [174] Yu WY, Xu JL, Shi NN, Wang LY, Han XJ, Wang YY, et al. Assessing the quality of  
501 the first batch of evidence-based clinical practice guidelines in traditional Chinese medicine. *J*  
502 *Tradit Chin Med*. 2011;31:376-81.

503 [175] Zadvinskis IM, Grudell BA. Clinical practice guideline appraisal using the AGREE  
504 instrument: renal screening. *Clin Nurse Spec*. 2010;24:209-14.

505 [176] Zheng ZH, Cui SQ, Lu XQ, Zakus D, Liang WN, Huang F, et al. Analysis of the status  
506 of Chinese clinical practice guidelines development. *BMC Health Serv Res*. 2012;12:218.

- 507 **No reporting of standardized domain scores**
- 508 [1] Abrahamyan L, Boom N, Donovan LR, Tu JV. An international environmental scan of  
509 quality indicators for cardiovascular care. *Can J Cardiol.* 2012;28:110-8.
- 510 [2] Brenol CV, Nava JIG, Soriano ER. Proper management of rheumatoid arthritis in Latin  
511 America. What the guidelines say? *Clin Rheumatol.* 2015;34:S51-S5.
- 512 [3] Brouwers MC, Kho ME, Browman GP, Burgers JS, Cluzeau F, Feder G, et al. The Global  
513 Rating Scale complements the AGREE II in advancing the quality of practice guidelines. *J*  
514 *Clin Epidemiol.* 2012;65:526-34.
- 515 [4] Brouwers MC, Rawski E, Spithoff K, Oliver TK. Inventory of Cancer Guidelines: a tool  
516 to advance the guideline enterprise and improve the uptake of evidence. *Expert Rev*  
517 *Pharmacoecon Outcomes Res.* 2011;11:151-61.
- 518 [5] Chen YL, Yao L, Xiao XJ, Wang Q, Wang ZH, Liang FX, et al. Quality assessment of  
519 clinical guidelines in China: 1993-2010. *Chin Med J (Engl).* 2012;125:3660-4.
- 520 [6] Conway MA, McCollom C, Bannon C. Central venous catheter flushing  
521 recommendations: a systematic evidence-based practice review. *J Pediatr Oncol Nurs.*  
522 2014;31:185-90.
- 523 [7] Edstrom E, Westerberg L, Henricson M. Appraisal of guidelines for pre-operative body  
524 wash. *Br J Nurs.* 2014;23:1106-13.
- 525 [8] Gagliardi AR, Brouwers MC. Do guidelines offer implementation advice to target users?  
526 A systematic review of guideline applicability. *BMJ Open.* 2015;5:e007047.
- 527 [9] Guo J, Cheng C, Yan W, Xu G, Feng J, Wang T, et al. Systematic review of clinical  
528 practice guidelines related to multiple sclerosis. *PLoS One.* 2014;9:e106762.
- 529 [10] Hazlewood GS, Akhavan P, Schieir O, Marshall D, Tomlinson G, Bykerk V, et al.  
530 Adding a "GRADE" to the quality appraisal of rheumatoid arthritis guidelines identifies  
531 limitations beyond AGREE-II. *J Clin Epidemiol.* 15.09.2014 [Epub ahead of print].
- 532 [11] Isaac A, Saginur M, Hartling L, Robinson JL. Quality of reporting and evidence in  
533 American Academy of Pediatrics guidelines. *Pediatrics.* 2013;131:732-8.
- 534 [12] Jacobs C, Graham ID, Makarski J, Chasse M, Fergusson D, Hutton B, et al. Clinical  
535 practice guidelines and consensus statements in oncology: an assessment of their  
536 methodological quality. *PLoS One.* 2014;9:e110469.
- 537 [13] Jakes AD, Marec-Berard P, Phillips RS, Stark DP. Critical review of clinical practice  
538 guidelines for fertility preservation in teenagers and young adults with cancer. *J Adolesc*  
539 *Young Adult Oncol.* 2014;3:144-52.
- 540 [14] Jiang M, Liao LY, Liu XQ, He WQ, Guan WJ, Chen H, et al. Quality assessment of  
541 clinical practice guidelines for respiratory diseases in China: a systematic appraisal. *Chest.*  
542 2015;148:759-66.

- 543 [15] Kaufman AL, Spitz J, Jacobs M, Sorrentino M, Yuen S, Danahey K, et al. Evidence for  
544 clinical implementation of pharmacogenomics in cardiac drugs. *Mayo Clin Proc.*  
545 2015;90:716-29.
- 546 [16] Knops RR, Kremer LC, Verhagen AA. Paediatric palliative care: recommendations for  
547 treatment of symptoms in the Netherlands. *BMC Palliat Care.* 2015;14:57.
- 548 [17] Lee YK, Shin ES, Shim JY, Min KJ, Kim JM, Lee SH. Developing a scoring guide for  
549 the Appraisal of Guidelines for Research and Evaluation II instrument in Korea: a modified  
550 Delphi consensus process. *J Korean Med Sci.* 2013;28:190-4.
- 551 [18] Malheiro R, De Monteiro-Soares M, Hassan C, Dinis-Ribeiro M. Methodological quality  
552 of guidelines in gastroenterology. *Endoscopy.* 2014;46:513-25.
- 553 [19] Ngo J, Holroyd-Leduc JM. Systematic review of recent dementia practice guidelines.  
554 *Age Ageing.* 2015;44:25-33.
- 555 [20] Oh MK, Jo H. Improving the reliability of clinical practice guideline appraisals: effects  
556 of the Korean AGREE II scoring guide. *J Korean Med Sci.* 2014;29:771-5.
- 557 [21] Petrarca S, Follmann M, Breitbart EW, Nolte S. Critical appraisal of clinical practice  
558 guidelines for adaptation in the evidence-based guideline "prevention of skin cancer". *JAMA*  
559 *Dermatol.* 2013;149:466-71.
- 560 [22] Rashidian A, Yousefi-Nooraie R. Development of a Farsi translation of the AGREE  
561 instrument, and the effects of group discussion on improving the reliability of the scores. *J*  
562 *Eval Clin Pract.* 2012;18:676-81.
- 563 [23] Rosumeck S, Sporbeck B, Rzany B, Nast A. Disclosure of potential conflicts of interest  
564 in dermatological guidelines in Germany: an analysis; status quo and quo vadis. *J Dtsch*  
565 *Dermatol Ges.* 2011;9:297-304.
- 566 [24] Sabharwal S, Patel V, Nijjer SS, Kirresh A, Darzi A, Chambers JC, et al. Guidelines in  
567 cardiac clinical practice: evaluation of their methodological quality using the AGREE II  
568 instrument. *J R Soc Med.* 2013;106:315-22.
- 569 [25] Shah A, Mohamed-Ahmed O, Peirsegaele P, McClymont C, Knight M. Incident reviews  
570 in UK maternity units: a systematic appraisal of the quality of local guidelines. *BMC*  
571 *Pregnancy Childbirth.* 2015;15:58.
- 572 [26] Sawyer AC, Livingston MH, Manja V, Brouwers MC. The quality of guidelines in  
573 pediatric surgery: can we all AGREE? *Pediatr Surg Int.* 2015;31:61-8.
- 574 [27] Siering U, Ruther A. Erfahrungen mit Leitliniensynopsen am Beispiel der Synopsen für  
575 Disease-Management-Programme (DMP). *Z Evid Fortbild Qual Gesundheitswes.* 2014;108:560-  
576 8.
- 577 [28] Sonawane DB, Karvande SS, Cluzeau FA, Chavan SA, Mistry NF. Appraisal of  
578 maternity management and family planning guidelines using the agree II instrument in India.  
579 *Indian J Public Health.* 2015;59:264-71.



- 580 [29] Sun M, Zhang M, Shen J, Yan J, Zhou B. Critical appraisal of international guidelines  
581 for the management of diabetic neuropathy: is there global agreement in the internet era? *Int J*  
582 *Endocrinol.* 2015;2015:519032.
- 583 [30] Tirota D, Marchetti A, Di Lillo M, Pomero F, Re R, Meschi M, et al. Abdominal pain: a  
584 synthesis of recommendations for its correct management. *Italian Journal of Medicine.*  
585 2015;9:193-202.
- 586 [31] Van Biesen W, Van de Velde T, Slabbaert M, Simoens I, Van Paemel R, Van der Veer  
587 SN. Blood pressure management in patients with chronic kidney disease: an appraisal and  
588 summary of existing guidelines. *Acta Clin Belg.* 2013;68:394-8.
- 589 [32] Yuwen Y, Han X, Shi N, Wang L, Liao X, Zhong L, et al. Appraisal of clinical practice  
590 guidelines for the management of rheumatoid arthritis in traditional Chinese medicine using  
591 the AGREE II instrument: a systematic review. *Eur J Integr Med.* 2014;6:176-85.
- 592 [33] Yuwen Y, Shi NN, Han XJ, Gao Y, Xu JL, Liu DS, et al. Appraisal of clinical practice  
593 guidelines for ischemic stroke management in Chinese medicine with appraisal of guidelines  
594 for research and evaluation instrument: a systematic review. *Chin J Integr Med.* 18.06.2014  
595 [Epub ahead of print].
- 596 [34] Zargham-Boroujeni A, Zoafa A, Marofi M, Badiee Z. Compilation of the neonatal  
597 palliative care clinical guideline in neonatal intensive care unit. *Iran J Nurs Midwifery Res.*  
598 2015;20:309-14.
- 599 [35] Zhang ZW, Liu XW, Xu BC, Wang SY, Li L, Kang YY, et al. Analysis of quality of  
600 clinical practice guidelines for otorhinolaryngology in China. *PLoS One.* 2013;8:e53566.
- 601 **Published before 2009**
- 602 None
- 603 **Full text not available**
- 604 [1] Abstracts of 16th National Congress of SIGENP. *Dig Liver Dis.* 2009;41:S199-S244.
- 605 [2] Abarshi E, Rietjens J, Caraceni A, Payne S, Deliens L, Van den Block L. International  
606 comparison of content and quality of clinical practice guidelines on palliative sedation. *Palliat*  
607 *Med.* 2014;28:571.
- 608 [3] Abarshi E, Rietjens J, Caraceni A, Payne S, Deliens L, Van den Block L. A standardised  
609 approach for comparing guidance documents on sedation practices in palliative care. *Palliat*  
610 *Med.* 2014;28:659.
- 611 [4] Abdelsattar ZM, Wong SL. A comparison of rectal cancer clinical practice guidelines.  
612 *Ann Surg Oncol.* 2014;21:S14.
- 613 [5] Agrawal SG. ECIL vs. IDSA guidelines. *Mycoses.* 2011;54:41-2.
- 614 [6] Ahmed A, Soliman S, Awad LA. A validated clinical practice guideline for community  
615 health nurses working in tuberculosis out-patient clinics. *Int J Infect Dis.* 2010;14:e147.

- 616 [7] Akhavan P, Schieir O, Hazlewood G, Bykerk V, Bombardier C. Strength of evidence in  
617 guidelines regarding the pharmacological management of RA. *J Rheumatol*. 2010;37:1314.
- 618 [8] Al-Mustafa B, Al-Faraj N, Al-Eid N, Al-Mobarak A, Hejlis M, Al-Salman E, et al.  
619 Cardiometabolic risk management guidelines in primary care: addressing barriers of  
620 implementation. *J Hypertens*. 2012;30:e138-e9.
- 621 [9] Azermai M, Petrovic M, Elseviers M, Bourgois J, Van Bortel L, Van der Stichele R.  
622 Systematic quality appraisal and recommendation extraction from dementia guidelines on  
623 management of behavioural and psychological symptoms. *Basic Clin Pharmacol Toxicol*.  
624 2011;109:94-5.
- 625 [10] Banaschewski T, Hohmann S, Taylor E, Coghill D, Zuddas A, Soutullo C, et al. ESCAP  
626 guidelines workshop ADHD. *Eur Child Adolesc Psychiatry*. 2013;22:S114.
- 627 [11] Bancos I, Cheng T, Prokop L, Montori V, Murad M. Should you follow practice  
628 guidelines in endocrinology? A systematic assessment of their methodological quality.  
629 *Endocr Rev*. 2011;32:Abstract P2-765.
- 630 [12] Barrie A, Bedford M, Elfvinge P, Gronhaug S, Mueller-Kaegi E, Schrijvers L. Evidence-  
631 based development of clinical practice guideline for peripheral self-infusion of prophylaxis.  
632 *Haemophilia*. 2015;21:65-6.
- 633 [13] Barriocanal A, Lopez A, Costa J, Montane E. Quality of clinical practice guidelines for  
634 peripheral arterial disease: a systematic review. *Basic Clin Pharmacol Toxicol*. 2013;113:11.
- 635 [14] Batabyal P, Chapman JR, Wong G, Craig J, Tong A. Clinical practices guidelines on  
636 waitlisting for kidney transplantation: a systematic review. *Transplantation*. 2012;94:525.
- 637 [15] Batabyal P, Chapman JR, Wong G, Craig JC, Tong A. Clinical practice guidelines on  
638 waitlisting for kidney transplantation: consistent and equitable? *Nephrology*. 2012;17:82.
- 639 [16] Bennett WL, Odelola O, Wilson L, Bolen S, Bass EB, Dalal D, et al. Systematic review  
640 of clinical practice guidelines on the pharmacologic treatment of type 2 diabetes mellitus: are  
641 guidelines evidence-based? *J Gen Intern Med*. 2011;26:S70-S1.
- 642 [17] Binopal N, Moore G, Lemyre B, Daboval T, Dunn S, Leduc S. Quality appraisal of  
643 international guidelines on perinatal care of extremely premature infants. *Arch Dis Child*.  
644 2014;99:A129-A30.
- 645 [18] Bourn AN, Conaghan PG, Arden NK, Cooper C, Dougados M, Edwards CJ. The quality  
646 of eular management recommendations: a review ten years after publication of standardised  
647 operating procedures. *Ann Rheum Dis*. 2014;73:173.
- 648 [19] Brener SS, Nikitovic M, Chambers A, Ghazipura M, Schaink AK, Lambrinos AI, et al.  
649 Evidence-based practice recommendations: Health Quality Ontario's approach. *Value Health*.  
650 2014;17:A29.

- 651 [20] Brosseau L, Toupin-April K, Paterson G, De Angelis G, Loew L. The non  
652 pharmacological management of osteoarthritis & rheumatoid arthritis. *J Rheumatol*.  
653 2014;41:1520-1.
- 654 [21] Brouwers MC, Rawski E, Bahirathan L, Spithoff K, Zwaal C. SAGE directory of cancer  
655 guidelines. *J Clin Oncol*. 2012;30:Abstract 306.
- 656 [22] Brunetti VI, Centeno P, Monteagudo EG, Anchorena RM. Evidence-based guideline for  
657 the hormone modulation of the adult brain-dead organ donor: vasopressin, corticosteroids and  
658 thyroid hormones use. *Transplantation*. 2013;96:S221.
- 659 [23] Butcher R, Lin F, Jones J, Rickard C. The quality of published central venous catheter  
660 clinical practice guidelines: a systematic appraisal using the AGREE II instrument. *J Vasc*  
661 *Access*. 2014;15:208.
- 662 [24] Cammarata S, Adami S, Paciello A, Del Santo F, Simbula S, Messori A. IPERPTO: a  
663 new idea for the online hospital drug formulary. *Eur J Hosp Pharm Sci Pract*. 2012;19:200-1.
- 664 [25] Choi J, Choi TY, Lee JA, Jun JH, Lee MS. The quality of clinical practice guidelines in  
665 traditional medicine in Korea: appraisal using the AGREE II instrument. *Integrative Medicine*  
666 *Research*. 2015;4:135.
- 667 [26] Currie A, Malik A, Askari A, Nachiappan S, Thomas-Gibson S, Faiz O, et al. An  
668 international comparison of clinical practice guidelines for the management of malignant  
669 colorectal polyps. *Gut*. 2015;64:A332.
- 670 [27] De Hert M. Systematic evaluation of guidelines for monitoring cardio-metabolic risk in  
671 schizophrenia. *Schizophr Res*. 2012;136:S59.
- 672 [28] De Hert M, Vancampfort D, Correll C, Peuskens J, Van Winkel R, Mitchell A. A  
673 systematic evaluation and comparison of the guidelines for screening and monitoring of  
674 cardiometabolic risk in people with schizophrenia. *Eur Psychiatry*. 2011;26:2189.
- 675 [29] De Seixas MD, Muller U. Systematic review of national and international guidelines on  
676 ADHD. *Eur Psychiatry*. 2009;24:S395.
- 677 [30] Deutsch L, King E, Sinclair S, Hastings P, Mazza D, Chakraborty S, et al. Investigating  
678 symptoms of lung cancer: an evidence-based guide for general practitioners. *J Thorac Oncol*.  
679 2013;8:S980-S1.
- 680 [31] Gaebel W. Recommendations on pharmacological treatment: recent updates. *Eur Arch*  
681 *Psychiatry Clin Neurosci*. 2011;261:S49.
- 682 [32] Gaitan Duarte H, Rodriguez A, Angel-Muller E, Lopez-Gomez H, Estrada S, Cinets A.  
683 Clinical practice guideline for sexually transmitted infections and other infection of the  
684 genital tract: syndromic management; 2012. *Sex Transm Infect*. 2013;89:A368.
- 685 [33] Gou Y, Li F, Jin A, Wang W, Huang X. An appraisal of clinical practice guidelines for  
686 irritable bowel syndrome. *Journal of Gastroenterology and Hepatology (Australia)*.  
687 2015;30:44.

- 688 [34] Harle I, Saunders D, Bak K, Jarvis V, Argier P, Cheung A, et al. Development of a  
689 multidisciplinary, evidence based symptom management tool for oral care in cancer therapy.  
690 Support Care Cancer. 2013;21:S151.
- 691 [35] Harstall C. Generating the evidence for the development of guideline for headache  
692 disorders. Pain Res Manag. 2012;17:202.
- 693 [36] Hazlewood G, Schieir O, Akhavan P, Bykerk V, Bombardier C. Finding guidelines to  
694 AGREE on: a quality appraisal of international guidelines on the pharmacological treatment of  
695 rheumatoid arthritis. J Rheumatol. 2010;37:1314.
- 696 [37] Hennessy K, Woodburn J, Steultjens M. Critical appraisal of clinical practice guidelines  
697 for foot and ankle management in rheumatoid arthritis. Rheumatology (Oxford).  
698 2013;52:i108.
- 699 [38] Jacobs CM, Graham ID, Makarski J, Chasse M, Fergusson D, Clemons MJ. An  
700 evaluation of the methodologic quality of clinical practice guidelines and consensus  
701 statements in oncology. J Clin Oncol. 2014;32:Abstract e17629.
- 702 [39] Jiang M, Li YM, Zheng JP. Quality assessment of clinical practice guidelines  
703 inrespiratory diseases in China: a systematic appraisal. Respirology. 2014;19:195.
- 704 [40] Jiang M, Liao L, Liu X, Guan W, Li Y. Quality assessment of clinical practice guidelines  
705 for respiratory diseases in China: a systematic appraisal. Eur Respir J. 2015;46:PA711.
- 706 [41] Keating D, McWilliams S, Cousins G, Strawbridge J, Clarke M. A systematic review of  
707 international guidelines for the pharmacological treatment of first episode schizophrenia.  
708 Early Intervention in Psychiatry. 2014;8:78.
- 709 [42] Kim HY, Lee H, Kim HK, Park HK, Oh MG, Park JW. Appraisal of the guidelines on  
710 the management of hepatocellular carcinoma. Hepatology. 2011;54:1399A-400A.
- 711 [43] Kirby J, Scharnitz TP, Seiverling ES, Ahrns HS, Ferguson SS. Evaluation of actinic  
712 keratosis clinical practice guidelines. J Invest Dermatol. 2015;135:S51.
- 713 [44] Kis E, Brychta P. Methodological background of the European guidelines for burn care  
714 practice. Burns. 2011;37:S24.
- 715 [45] Kobleder A, Ivanovic N, Raphaelis S, Gafner D, Senn B. Health education in patients  
716 with vulvar neoplasia and surgical treatment: an evidence based guideline. Int J Gynecol  
717 Cancer. 2014;24:1131-2.
- 718 [46] La Chapelle C, Jansen FW. Multidisciplinary guideline development in MIS: a challenge  
719 for all? Gynecol Surg. 2011;8:S66-S7.
- 720 [47] Lalucat-Jo L, Carbonero M, Faus G, Guillamon I, Martinez C, Laia M, et al.  
721 Comparative study of international clinical practice guidelines about schizophrenia and early  
722 psychosis management. Eur Arch Psychiatry Clin Neurosci. 2009;259:S80-S1.

- 723 [48] Lamontagne ME, Swaine B, St-Pierre C, Truchon C. A scoping review and a quality  
724 evaluation of clinical practice guidelines for the rehabilitation of adults with moderate-  
725 tosevere traumatic brain injury. *Brain Inj.* 2014;28:827.
- 726 [49] Larenas-Linnemann D. ARIA Mexico 2014: transculturization of a guideline involving  
727 11 national medical societies. *World Allergy Organ J.* 2014;8:A286.
- 728 [50] Lee T, Park B, Bolla KC, Sung J, Chiluveru S, Park S, et al. Systematic quality  
729 assessment of published antishivering protocols. *Neurocrit Care.* 2014;21:S77.
- 730 [51] Li-Yu JT, Perez EC, Canete A, Bonifacio L, Llamado LQ, Martinez R, et al. Consensus  
731 guidelines on osteoporosis diagnosis, prevention, and management in the Philippines.  
732 *Osteoporos Int.* 2010;21:S751.
- 733 [52] Lo Vecchio A, Giannattasio A, De Masi S, Ortisi MT, Parola L, Duggan C, et al.  
734 Evaluation of quality of guidelines for acute gastroenteritis in children with the AGREE  
735 instrument. *Dig Liver Dis.* 2009;41:S202.
- 736 [53] Lo Vecchio A, Giannattasio A, Duggan C, De Masi S, Ortisi M, Parola L, et al.  
737 Evaluation of the quality of guidelines for acute gastroenteritis in children, with the AGREE  
738 instrument. *J Pediatr Gastroenterol Nutr.* 2010;50:E27.
- 739 [54] McCaul M. Spinal clearance guideline for out-of hospital providers. *Afr J Emerg Med.*  
740 2013;3:S7.
- 741 [55] McGillion M. The new CPS development and review process. *Pain Res Manag.*  
742 2013;18:e14.
- 743 [56] Mei J. Cough clinical practice guidelines: a critical review of scientific evidence and  
744 recommendations. *Respirology.* 2015;20:105.
- 745 [57] Mohamed S, Al-Juryyan N, Babiker A, Al-Otibi H, Hasanato R, Omer H, et al.  
746 Development and implementation of clinical practice guidelines in diabetic ketoacidosis:  
747 NICE is also nice in the Middle East. *Horm Res Paediatr.* 2013;80:290-1.
- 748 [58] Mohamed S, Al-Juryyan N, Babiker A, Iqbal SM, Osman MEF, Al-Nemri A.  
749 Development and implementation of clinical practice guidelines in pediatric endocrinology:  
750 challenges and opportunities. *Endocr Rev.* 2013;34:Abstract MON-282.
- 751 [59] Moore G, Lemyre B, Daboval T, Dunn S. Quality appraisal of Canadian guidelines on  
752 the perinatal care of potential extremely premature infants: how do they rate? *Paediatr Child*  
753 *Health (Oxford).* 2014;19:e68-e9.
- 754 [60] Nagler EV, Vanmassenhove J, Van der Veer SN, Nistor I, Van Biesen W, Webster AC,  
755 et al. Diagnosis and treatment of hyponatraemia: a systematic review of clinical practice  
756 guidelines. *Nephrol Dial Transplant.* 2013;28:i386.
- 757 [61] Origasa H. Critical appraisal of the Japanese guideline for the management of stroke.  
758 *Value Health.* 2009;12:A345.

- 759 [62] Padjas A, Schünemann H, Bousquet J, Brozek J. Assessment of the quality of  
760 methodological rigour and reporting of clinical practice guidelines for the management of  
761 allergic rhinitis study. *World Allergy Organ J.* 2012;5:S97-S8.
- 762 [63] Parisi P. Quality of clinical guidelines in pediatric headache. *Ital J Pediatr.* 2014;40:A86.
- 763 [64] Pearson EJM, McKinstry CE, Morris ME. Which clinical practice guideline for cancer-  
764 related fatigue is the most suitable for application in Australia? *Asia Pac J Clin Oncol.*  
765 2015;11:111.
- 766 [65] Piano V, Schalkwijk A, Burgers J, Varrassi G, Kress H, Verhagen C, et al. Assessment  
767 with agree II of European clinical practice guidelines for the treatment of neuropathic pain in  
768 cancer patients. *Eur J Pain Suppl.* 2011;5:268.
- 769 [66] Pregno S, Trevisiol C. How to choose recommendations from different guidelines the  
770 available methodological instruments. *Tumour Biol.* 2011;32:S46.
- 771 [67] Rodriguez-Martinez CE, Sossa-Briceno MP, Acuna-Cordero R. Quality assessment of  
772 acute viral bronchiolitis clinical practice guidelines. *Eur Respir J.* 2015;46:Abstract PA1334.
- 773 [68] Rubtsova I, Shilkina O, Lishchyshyna O. Towards creating a national system of care for  
774 patients with orphan diseases. *Value Health.* 2015;18:A676.
- 775 [69] Sanchez E, Rossi F. Concerns on who guidelines of treating and preventing HIV  
776 infection. *Value Health.* 2015;18:A247.
- 777 [70] Santos F, Sola I, Rigau D, Arevalo-Rodriguez I, Seron P, Alonso-Coello P, et al. Quality  
778 assessment of clinical practice guidelines for the prescription of antidepressant drugs during  
779 pregnancy. *J Popul Ther Clin Pharmacol.* 2011;18:e185-e6.
- 780 [71] Savoia H, Roberts J, Abeyapala W, Challis D, Clarke M, Earnshaw L, et al. Evidence-  
781 based patient blood management guidelines for obstetric and maternity patients. *BJOG.*  
782 2015;122:302.
- 783 [72] Schalkwijk A, Piano V, Hekster Y, Kress H, Lanteri-Minet M, Burgers J, et al.  
784 Comparative analysis of european recommendations and evidence analysis of treatment of  
785 neuropathic pain in cancer patients with the linker procedure. *Palliat Med.* 2012;26:483.
- 786 [73] Schieir O, Hazlewood G, Akhavan P, Bykerk V, Bombardier C. Adapting ADAPTE: a  
787 novel methodology for the development of national clinical practice guidelines. *J Rheumatol.*  
788 2010;37:1315.
- 789 [74] Schildmann E, Schildmann J. Palliative sedation therapy: a limited systematic review on  
790 content and quality of guidelines. *Palliat Med.* 2010;24:S96.
- 791 [75] Schildmann EK, Schildmann JA, Dietz I. Palliative sedation therapy (PST) guidelines:  
792 findings from a systematic review and quality assessment. *Palliat Med.* 2014;28:566-7.
- 793 [76] Schmidt S, Manns MP, Greten TF. Qualitative analysis of international guidelines for  
794 diagnosis and treatment of hepatocellular carcinoma by the agree instrument (Appraisal of  
795 Guidelines for Research and Evaluation). *J Hepatol.* 2010;52:S233.

- 796 [77] Schoenmaker N, Tromp M, Van der Lee H, Offringa M, Groothoff J. Current guidelines  
797 for the management of chronic dialysis in children: a systematic review. *Pediatr Nephrol.*  
798 2011;26:1594-5.
- 799 [78] Schrijvers D, Rosselli Del Turco M, Marotti L, Maddock C. European cancer guidelines:  
800 a survey. *Eur J Cancer.* 2011;47:S267.
- 801 [79] Shikata S, Sato T, Miyazaki K, Okumura A, Takagaki N, Nakayama T, et al. Description  
802 of palliative medicine in guidelines for digestive system cancer medical care. *J Clin Oncol.*  
803 2010;28:Abstract e19628.
- 804 [80] Siddiqui J, Sherren PB, Birchall MA. Evidence-based guidelines and protocols for the  
805 management of adult patients with a tracheostomy: a systematic review. *Crit Care.*  
806 2013;17:S62.
- 807 [81] Simmons CE, Hogeveen S, Nichols J, Trudeau-Tavara S, Quan M. Quality and  
808 consistency in breast cancer clinical guidelines internationally: are we globally consistent? *J*  
809 *Clin Oncol.* 2010;28:Abstract 6096.
- 810 [82] Skidmore B, Dupuis-Leon R, Chari R, Wilson RD, Blake J. When the need for change is  
811 evident: a review of Canadian Ob/Gyn clinical practice guidelines. *Int J Gynaecol Obstet.*  
812 2015;131:E254.
- 813 [83] Spuls PHI. Critical appraisal of treatment guidelines for psoriasis. *Br J Dermatol.*  
814 2012;167:e5-e6.
- 815 [84] Ste-Marie PA. Developing the 2012 fibromyalgia guidelines: lessons learned. *Pain Res*  
816 *Manag.* 2013;18:e15.
- 817 [85] Stergiou-Kita M, Dawson D, Rappolt S, Beaton D. Developing a guideline for vocational  
818 evaluation following traumatic brain injury: the systematic review. *Arch Phys Med Rehabil.*  
819 2010;91:e7-e8.
- 820 [86] Stergiou-Kita M, Dawson D, Rappolt S, Hunt A. The inter-professional clinical practice  
821 guideline for vocational evaluation following traumatic brain injury: developing systematic  
822 and evidence-based approaches. *Brain Inj.* 2012;26:394-5.
- 823 [87] Stoffer M, Taurok D, Prodinger B, Smolen J, Woolf A, Stamm T. Are occupational  
824 therapy interventions included in the most commonly used European clinical-practice  
825 guidelines for the management of osteoarthritis? *Ann Rheum Dis.* 2012;71:754.
- 826 [88] Stone MA, Wilkinson JC, Charpentier G, Clochard N, Lindblad U, Muller UA, et al.  
827 Appraisal and comparison of guidelines for the management of people with type 2 diabetes in  
828 eight European countries. *Diabetologia.* 2009;52:S101.
- 829 [89] Szegesdi I, Kis E, Zimanyi M, Vimlati L, Kemeny L. Assessment of the scope and  
830 quality of clinical practice guidelines in burn injury. *Eur J Anaesthesiol.* 2009;26:16.

- 831 [90] Thompson GC, Ali S, Neto G, Gouin S, McClennan S, Pearce J, et al. Developing  
832 guidelines for the early recognition and emergency management of severe sepsis in children.  
833 *Paediatr Child Health (Oxford)*. 2011;16:49A-50A.
- 834 [91] Tong A, Chapman J, Wong G, De Bruijn J, Craig JC. Screening and follow up of living  
835 kidney donors: a systematic review of clinical practice guidelines. *Am J Transplant*.  
836 2012;12:507.
- 837 [92] Tremblay M, LeBlanc A, Carson V, Connor Gorber S, Duggan M, Janssen I, et al.  
838 Development and launch of the Canadian Physical Activity Guidelines for the Early Years. *J*  
839 *Sci Med Sport*. 2012;15:S325-S6.
- 840 [93] Tunnicliffe DJ, Kim S, Singh-Grewal D, Phoon RKS, Craig JC, Tong A. Diagnosis,  
841 monitoring and treatment of lupus nephritis: systematic review of clinical practice guidelines.  
842 *Nephrology*. 2014;19:38.
- 843 [94] Van Royen K, Remmen R, Vanmeerbeek M, Peremans L. Collaborative care in the  
844 management of addiction to alcohol, illegal drugs, hypnotics and tranquilizers: a review. *Eur J*  
845 *Gen Pract*. 2013;19:34.
- 846 [95] Vogel G, Eldh AC. Evidence as a basis for clinical practice guidelines on mechanical  
847 ventilation in intensive care in Sweden. *Intensive Care Med*. 2012;38:S225.
- 848 [96] Weinmann S. European and international guidelines on schizophrenia: consistencies and  
849 disagreements. *Eur Arch Psychiatry Clin Neurosci*. 2009;259:S20-S1.
- 850 [97] White P, Finch C. An assessment of the 2008 Zurich consensus statement on concussion  
851 in sport using the Appraisal of Guidelines for Research and Evaluation II (AGREE II). *J Sci*  
852 *Med Sport*. 2013;16:e22.
- 853 [98] Wiegerinck M, Huigen S, Van Barneveld T, Mol BW, Duvekot H. Comparing  
854 international guidelines on hypertensive disorders in pregnancy. *Am J Obstet Gynecol*.  
855 2012;206:S283.
- 856 [99] Xiaofeng Kang X, Li Z, Himmelfarb CD, Zhang J, Li Q, Lv R, et al. Quality appraisal of  
857 international clinical practice guidelines for managing acute heart failure. *Eur J Heart Fail*.  
858 2015;17:424.
- 859 [100] Yamada J, Lee G, Kyololo O, Shorkey A, Stevens B. Systematic review of acute  
860 procedural pain guidelines for infants and children. *J Pain*. 2014;15:S68.

861 **Multiple publication**

862 None

863 **No German- or English-language publication**

- 864 [1] Calvache JA, Guzman EL, Buitrago LMG, Torres CG, Torres M, Buitrago G, et al.  
865 Evidence-based clinical practice manual: postoperative complications management. *Revista*  
866 *Colombiana de Anestesiologia*. 2015;43:51-60.



- 867 [2] Chen H, Li GL, Xu WT, Xu B. Quality assessment of clinical practice guidelines of  
868 acupuncture in China. *Chinese Journal of Evidence-Based Medicine*. 2014;14:772-5.
- 869 [3] Chen Y, Hu SL, Li YP, Shen G, Yan BX, Wang L. Global guidelines concerning  
870 pharmacological intervention for complicated hypertension: a systematic review. *Chinese*  
871 *Journal of Evidence-Based Medicine*. 2012;12:1446-62.
- 872 [4] Chen Y, Hu SL, Li YP, Shen G, Yan BX, Wang L. Guidelines concerning  
873 pharmacological intervention in simple hypertension: a systematic review. *Chinese Journal of*  
874 *Evidence-Based Medicine*. 2012;12:1180-94.
- 875 [5] Cui SC, Hou HY, Li YP, Chen YQ, Lan XX. Clinical practice guidelines on infertility: a  
876 systematic review. *Chinese Journal of Evidence-Based Medicine*. 2013;13:947-54.
- 877 [6] Wei ML, Liu M. Analysis of clinical guidelines developed based on evidence in China.  
878 *Chinese Journal of Evidence-Based Medicine*. 2013;13:927-32.
- 879 [7] Zhang LL, Li YP, Zhang C, Huang L, Liang Y, Han L. Analysis on status of clinical  
880 guidelines and evaluation on evidence-based guidelines of children in China. *Chinese Journal*  
881 *of Evidence-Based Medicine*. 2011;11:991-9.
- 882
