# Supplementary material for: Guideline appraisal with AGREE II: Systematic review of the current evidence on how users handle the 2 overall assessments
Source: PubMed Central journal article supplement (PMC5373625; doi:10.1371/journal.pone.0174831), 2017-03-30
Supplement: pone.0174831.s004.pdf [file pone.0174831.s004.pdf]

#### S4: Characteristics of guidelines included in the publications

| Author / Year          | Aim of publication                                                                                                                                                                                                                 | Number of assessors | Number of guidelines appraised with AGREE II | Publication dates of guidelines included       | Guideline topic                                              |
|------------------------|------------------------------------------------------------------------------------------------------------------------------------------------------------------------------------------------------------------------------------|---------------------|----------------------------------------------|------------------------------------------------|--------------------------------------------------------------|
| Abdelsattar 2015       | <ul style="list-style-type: none"> <li>▪ Assessment of the methodological quality of guidelines</li> <li>▪ Assessment of the evidence base of guidelines</li> <li>▪ Comparison of recommendations of several guidelines</li> </ul> | 4                   | 5                                            | 2011-2014                                      | Colon cancer                                                 |
| Acuna-Izcaray 2013     | Assessment of the methodological quality of guidelines                                                                                                                                                                             | 4                   | 18                                           | 2001, 2003, 2005-2009                          | Asthma                                                       |
| Agrawal 2012           | <ul style="list-style-type: none"> <li>▪ Assessment of the methodological quality of guidelines</li> <li>▪ Comparison of recommendations of several guidelines</li> </ul>                                                          | 2                   | 10                                           | 2008-2010                                      | Invasive fungal disease (haematological-oncological setting) |
| Al-Ansary 2013         | <ul style="list-style-type: none"> <li>▪ Assessment of the methodological quality of guidelines</li> <li>▪ Comparison of recommendations of several guidelines</li> </ul>                                                          | 4                   | 11                                           | 2006-2011                                      | Hypertension                                                 |
| Altman 2015            | <ul style="list-style-type: none"> <li>▪ Assessment of the methodological quality of guidelines</li> <li>▪ Comparison of recommendations of several guidelines</li> </ul>                                                          | 10                  | 2                                            | 2003, 2008, 2009, 2012-2014                    | Osteoarthritis                                               |
| Alvarez-Vargas 2015    | Assessment of the methodological quality of guidelines                                                                                                                                                                             | 3                   | 4                                            | 2013, 2014                                     | Hypertension                                                 |
| Arevalo-Rodriguez 2013 | Assessment of the methodological quality of guidelines                                                                                                                                                                             | 4                   | 15                                           | 2005-2011                                      | Dementia                                                     |
| Armstrong 2016         | <ul style="list-style-type: none"> <li>▪ Assessment of the methodological quality of guidelines</li> <li>▪ Comparison of recommendations of several guidelines</li> </ul>                                                          | 3                   | 19                                           | 2004, 2006, 2007, 2009, 2010, 2012, 2013, 2015 | Osteoporosis                                                 |
| Avin 2015              | Development of Clinical Guidance                                                                                                                                                                                                   | 3-5                 | 5                                            | 2003, 2011-2013,                               | Prevention of falls                                          |

| Author / Year  | Aim of publication                                                                                                                                                                    | Number of assessors         | Number of guidelines appraised with AGREE II | Publication dates of guidelines included            | Guideline topic                                                                                                                                                                                                                                                                                                                 |
|----------------|---------------------------------------------------------------------------------------------------------------------------------------------------------------------------------------|-----------------------------|----------------------------------------------|-----------------------------------------------------|---------------------------------------------------------------------------------------------------------------------------------------------------------------------------------------------------------------------------------------------------------------------------------------------------------------------------------|
|                | Statements (CGS) on the basis of guidelines                                                                                                                                           |                             |                                              | 2015                                                |                                                                                                                                                                                                                                                                                                                                 |
| Barber 2015    | <ul style="list-style-type: none"> <li>▪ Assessment of the methodological quality of guidelines</li> <li>▪ Assessment of the quality indicators included in the guidelines</li> </ul> | 2                           | 10                                           | 2009-2012                                           | Prevention of cardiovascular diseases in patients with rheumatoid arthritis                                                                                                                                                                                                                                                     |
| Bekkering 2014 | Identification of the current state of knowledge on the basis of high-quality guidelines                                                                                              | 2                           | 9                                            | 2007-2011                                           | Alcohol and drug abuse                                                                                                                                                                                                                                                                                                          |
| Binepal 2015   | Assessment of the methodological quality of guidelines                                                                                                                                | 3                           | 16                                           | 2001, 2002, 2004-2006, 2008, 2009, 2011, 2012, 2014 | Care of prematurely born infants                                                                                                                                                                                                                                                                                                |
| Birken 2015    | Assessment of the methodological quality of guidelines                                                                                                                                | 2                           | 16                                           | No details provided                                 | Care of cancer survivors                                                                                                                                                                                                                                                                                                        |
| Bragge 2014    | Assessment of the methodological quality of guidelines                                                                                                                                | 4                           | 11                                           | 2003, 2005-2008, 2011                               | <ul style="list-style-type: none"> <li>▪ Attention training</li> <li>▪ External aids as memory aids</li> <li>▪ Brain injury</li> <li>▪ Cognitive rehabilitation</li> <li>▪ Drug treatment of neurological complications of traumatic brain injury</li> <li>▪ Neurogenic limitation</li> <li>▪ Traumatic brain injury</li> </ul> |
| Brosseau 2014a | <ul style="list-style-type: none"> <li>▪ Assessment of the methodological quality of guidelines</li> </ul>                                                                            | 2                           | 11                                           | 2002, 2004, 2006, 2007, 2009, 2011                  | Rheumatoid arthritis                                                                                                                                                                                                                                                                                                            |
| Brosseau 2014b | <ul style="list-style-type: none"> <li>▪ Assessment of the methodological quality of guidelines</li> <li>▪ Comparison of recommendations of</li> </ul>                                | 2 (3. Assessor is used as a | 12                                           | 2001, 2003-2005, 2007-2008, 2010-2013               | Osteoarthritis                                                                                                                                                                                                                                                                                                                  |

| Author / Year | Aim of publication                                         | Number of assessors | Number of guidelines appraised with AGREE II | Publication dates of guidelines included | Guideline topic                                                                                                                                                                                                                                                                                                                                                                                                                                                                                                                                                                                                                                                                                                                                                                                                                                                                                             |
|---------------|------------------------------------------------------------|---------------------|----------------------------------------------|------------------------------------------|-------------------------------------------------------------------------------------------------------------------------------------------------------------------------------------------------------------------------------------------------------------------------------------------------------------------------------------------------------------------------------------------------------------------------------------------------------------------------------------------------------------------------------------------------------------------------------------------------------------------------------------------------------------------------------------------------------------------------------------------------------------------------------------------------------------------------------------------------------------------------------------------------------------|
|               | several guidelines                                         | substitute)         |                                              |                                          |                                                                                                                                                                                                                                                                                                                                                                                                                                                                                                                                                                                                                                                                                                                                                                                                                                                                                                             |
| Burda 2014    | Assessment of the methodological quality of WHO guidelines | 3                   | 124                                          | 2008-2012                                | <ul style="list-style-type: none"> <li>▪ Disability</li> <li>▪ Blood sampling / donation</li> <li>▪ Diabetes mellitus</li> <li>▪ Diarrhoea and pneumonia</li> <li>▪ Abuse of legal and illegal drugs</li> <li>▪ Diet and physical activity</li> <li>▪ Cancer</li> <li>▪ Air quality in buildings</li> <li>▪ Notifiable diseases (including diagnostics)</li> <li>▪ Women's health, contraception, pregnancy, birth, care of newborns</li> <li>▪ Infection control</li> <li>▪ Non-communicable diseases (not further specified)</li> <li>▪ Physiotherapy</li> <li>▪ Mental and neurological illnesses as well as disorders related to substance abuse</li> <li>▪ Radon concentration in buildings</li> <li>▪ Rehabilitation</li> <li>▪ Pain</li> <li>▪ Safe surgery</li> <li>▪ Injuries (not further specified)</li> <li>▪ Access to healthcare professionals</li> <li>▪ 9 guidelines provided no</li> </ul> |

| Author / Year        | Aim of publication                                                                                                                                                                                                                                              | Number of assessors | Number of guidelines appraised with AGREE II | Publication dates of guidelines included | Guideline topic details                                                                                                                                                                     |
|----------------------|-----------------------------------------------------------------------------------------------------------------------------------------------------------------------------------------------------------------------------------------------------------------|---------------------|----------------------------------------------|------------------------------------------|---------------------------------------------------------------------------------------------------------------------------------------------------------------------------------------------|
| Burnett 2014         | <ul style="list-style-type: none"> <li>▪ Comparison of recommendations of several guidelines</li> <li>▪ Assessment of the methodological quality of guidelines</li> </ul>                                                                                       | 3                   | 20                                           | 2002, 2004, 2006-2012                    | <ul style="list-style-type: none"> <li>▪ Acute lymphatic leukaemia</li> <li>▪ Autoimmune hepatitis</li> <li>▪ Inflammatory bowel and skin diseases</li> <li>▪ Rheumatic diseases</li> </ul> |
| Cassis 2015          | Assessment of the methodological quality of guidelines                                                                                                                                                                                                          | 2                   | 55                                           | 2001-2015                                | Inherited neurometabolic disorders                                                                                                                                                          |
| Castellani 2015      | Assessment of the methodological quality of guidelines                                                                                                                                                                                                          | 2                   | 14                                           | 2005-2007, 2009-2013                     | Bipolar disorders                                                                                                                                                                           |
| Chen 2015            | Assessment of the methodological quality of guidelines                                                                                                                                                                                                          | 2                   | 17                                           | 2001, 2004, 2007-2011                    | Hypertension                                                                                                                                                                                |
| Chua 2015            | <ul style="list-style-type: none"> <li>▪ Assessment of the methodological quality of guidelines</li> <li>▪ Comparison of recommendations of several guidelines</li> </ul>                                                                                       | 4                   | 10                                           | 2009-2013, 2015                          | Urinary tract infection                                                                                                                                                                     |
| Colebatch-Bourn 2015 | Improvement of the quality of rheumatology guidelines                                                                                                                                                                                                           | k. A.               | 27                                           | 2000, 2003, 2005-2014                    | Rheumatology                                                                                                                                                                                |
| Damiani 2014         | <ul style="list-style-type: none"> <li>▪ Examination of the applicability of guidelines to the target population</li> <li>▪ Examination of the association between guideline quality and the applicability to the target population</li> </ul>                  | 2                   | 22                                           | 2001, 2002, 2005-2008, 2010-2012         | Dementia                                                                                                                                                                                    |
| Dersch 2015          | Assessment of the methodological quality of guidelines                                                                                                                                                                                                          | 2                   | 8                                            | 1999, 2004, 2006, 2007, 2010, 2012       | Lyme borreliosis                                                                                                                                                                            |
| Don-Wauchope 2012    | <ul style="list-style-type: none"> <li>▪ Evaluation of the applicability of the AGREE II instrument to guidelines of the National Academy of Clinical Biochemistry</li> <li>▪ Assessment of the methodological quality of guidelines of the National</li> </ul> | 2                   | 11                                           | 2003, 2006, 2007, 2009, 2010             | Clinical biochemistry                                                                                                                                                                       |

| Author / Year     | Aim of publication                                                                                                                                                                                                                                        | Number of assessors | Number of guidelines appraised with AGREE II | Publication dates of guidelines included                                                         | Guideline topic                 |
|-------------------|-----------------------------------------------------------------------------------------------------------------------------------------------------------------------------------------------------------------------------------------------------------|---------------------|----------------------------------------------|--------------------------------------------------------------------------------------------------|---------------------------------|
|                   | Academy of Clinical Biochemistry                                                                                                                                                                                                                          |                     |                                              |                                                                                                  |                                 |
| Falconi 2015      | Assessment of the methodological quality of guidelines                                                                                                                                                                                                    | k. A.               | 8                                            | 2004-2007, 2012-2014                                                                             | Cystic neoplasm of the pancreas |
| Fisher 2014       | Development and implementation of guidelines                                                                                                                                                                                                              | 11                  | 1                                            | No details provided                                                                              | Urinary incontinence            |
| Fouche 2014       | Assessment of the methodological quality of guidelines                                                                                                                                                                                                    | 2                   | 1                                            | 2013                                                                                             | Arrhythmia                      |
| Gamst-Jensen 2014 | <ul style="list-style-type: none"> <li>▪ Assessment of the methodological quality of guidelines</li> <li>▪ Comparison of recommendations of several guidelines</li> </ul>                                                                                 | 2                   | 4                                            | <ul style="list-style-type: none"> <li>▪ 2007,</li> <li>▪ No details for 2 guidelines</li> </ul> | Burns                           |
| Gandhi 2015       | <ul style="list-style-type: none"> <li>▪ Assessment of the methodological quality of guidelines</li> <li>▪ Comparison of recommendations of several guidelines</li> </ul>                                                                                 | 2                   | 17                                           | 2006, 2007, 2009-2014                                                                            | Breast cancer                   |
| Gillon 2014       | <ul style="list-style-type: none"> <li>▪ Assessment of the methodological quality of guidelines</li> <li>▪ Comparison of recommendations of several guidelines</li> </ul>                                                                                 | 2                   | 13                                           | 2005, 2007, 2008-2013                                                                            | Hypertension in pregnancy       |
| Girardis 2016     | Assessment of the methodological quality of guidelines                                                                                                                                                                                                    | 4                   | 5                                            | 2006, 2008, 2010, 2013                                                                           | Analgo-sedation                 |
| Goyet 2014        | <ul style="list-style-type: none"> <li>▪ Identification of impeding factors for interventions on knowledge transfer in areas with low income</li> <li>▪ Development of implementation measures for knowledge transfer in areas with low income</li> </ul> | 3                   | 2                                            | 2013                                                                                             | Pneumonia                       |
| Grimmer 2014      | Development and testing of a short checklist for the assessment of the methodological quality of guidelines                                                                                                                                               | 3                   | 6                                            | 2007, 2009, 2011, 2012, 2013                                                                     | Traumatic brain injury          |

| <b>Author / Year</b> | <b>Aim of publication</b>                                                                                                                                                 | <b>Number of assessors</b> | <b>Number of guidelines appraised with AGREE II</b> | <b>Publication dates of guidelines included</b>                                                           | <b>Guideline topic</b>                                                                           |
|----------------------|---------------------------------------------------------------------------------------------------------------------------------------------------------------------------|----------------------------|-----------------------------------------------------|-----------------------------------------------------------------------------------------------------------|--------------------------------------------------------------------------------------------------|
| Gupta 2015           | <ul style="list-style-type: none"> <li>▪ Assessment of the methodological quality of guidelines</li> <li>▪ Comparison of recommendations of several guidelines</li> </ul> | 4                          | 13                                                  | No details provided                                                                                       | Prostate cancer                                                                                  |
| Gutarra-Vilchez 2014 | Assessment of the methodological quality of guidelines                                                                                                                    | 3                          | 14                                                  | 2006, 2008-2011                                                                                           | Assisted reproductive technology                                                                 |
| Haddadi 2015         | Assessment of the methodological quality of guidelines                                                                                                                    | 4                          | 7                                                   | 2009, 2011-2013                                                                                           | Breast cancer                                                                                    |
| Haran 2014           | Comparison of recommendations of several guidelines                                                                                                                       | 2                          | 5                                                   | 2006, 2009, 2011, 2012                                                                                    | Postpartum care                                                                                  |
| Harris 2012          | <ul style="list-style-type: none"> <li>▪ Assessment of the methodological quality of guidelines</li> <li>▪ Comparison of recommendations of several guidelines</li> </ul> | 2                          | 19                                                  | 2001, 2003, 2005, 2007-2011                                                                               | Breast cancer                                                                                    |
| He 2015              | Assessment of the methodological quality of guidelines                                                                                                                    | 4                          | 21                                                  | 2001, 2005, 2008-2014                                                                                     | Pancreatic cancer                                                                                |
| Heine 2015           | Assessment of the methodological quality of guidelines                                                                                                                    | 2                          | 6                                                   | <ul style="list-style-type: none"> <li>▪ 2005, 2010-2012</li> <li>▪ No details for 1 guideline</li> </ul> | Sensory hearing disorder                                                                         |
| Henig 2013           | Assessment of the methodological quality and reliability of guidelines                                                                                                    | 3                          | 20                                                  | 2004, 2005, 2007-2009, 2011, 2012                                                                         | <ul style="list-style-type: none"> <li>▪ Pneumonia</li> <li>▪ Urinary tract infection</li> </ul> |
| Holmer 2013          | Assessment of the methodological quality of guidelines                                                                                                                    | 2                          | 24                                                  | 2007-2012                                                                                                 | Diabetes mellitus type 2                                                                         |
| Holvoet 2015         | Assessment of the methodological quality of guidelines                                                                                                                    | 5                          | 21                                                  | 2003, 2004, 2009-2015                                                                                     | Gastrointestinal and liver diseases                                                              |
| Horner 2014          | <ul style="list-style-type: none"> <li>▪ Assessment of the methodological quality of guidelines</li> <li>▪ Comparison of recommendations of several guidelines</li> </ul> | 2                          | 26                                                  | 2006, 2008-2014                                                                                           | Cone Beam CT                                                                                     |

| Author / Year | Aim of publication                                                                                                                                                                                                                                                        | Number of assessors | Number of guidelines appraised with AGREE II | Publication dates of guidelines included                                                                        | Guideline topic                                                                                                                                              |
|---------------|---------------------------------------------------------------------------------------------------------------------------------------------------------------------------------------------------------------------------------------------------------------------------|---------------------|----------------------------------------------|-----------------------------------------------------------------------------------------------------------------|--------------------------------------------------------------------------------------------------------------------------------------------------------------|
| Huang 2015    | Assessment of the methodological quality of guidelines                                                                                                                                                                                                                    | 2                   | 5                                            | 1996, 2011, 2013                                                                                                | Androgenetic alopecia                                                                                                                                        |
| Huang 2013    | <ul style="list-style-type: none"> <li>▪ Assessment of the methodological quality of guidelines</li> <li>▪ Comparison of recommendations of several guidelines</li> </ul>                                                                                                 | 4                   | 10                                           | 2000, 2007, 2009-2013                                                                                           | Thyroid nodules and cancer                                                                                                                                   |
| Jiang 2015    | Assessment of the methodological quality of guidelines                                                                                                                                                                                                                    | 2                   | 49                                           | 2001-2012                                                                                                       | Head and neck tumours                                                                                                                                        |
| Jokhan 2015   | Comparison of the quality of local guidelines with the quality of national guidelines                                                                                                                                                                                     | 2                   | 2                                            | 2010, 2011                                                                                                      | Fetal movements                                                                                                                                              |
| Joosen 2015   | <ul style="list-style-type: none"> <li>▪ Assessment of the methodological quality of guidelines</li> <li>▪ Comparison of recommendations of several guidelines</li> </ul>                                                                                                 | 2                   | 14                                           | 2003, 2005-2011                                                                                                 | Mental illness                                                                                                                                               |
| Kawala 2014   | Assessment of the methodological quality of guidelines                                                                                                                                                                                                                    | 2                   | 4                                            | 2009, 2012, 2013                                                                                                | Acne                                                                                                                                                         |
| Kim 2014      | Description of the procedure for the update of a Korean guideline                                                                                                                                                                                                         | 2                   | 6                                            | No details provided                                                                                             | Helicobacter pylori infections                                                                                                                               |
| Kirby 2015    | Assessment of the methodological quality of guidelines                                                                                                                                                                                                                    | No details provided | 7                                            | <ul style="list-style-type: none"> <li>▪ 2006-2009, 2011, 2014</li> <li>▪ No details for 1 guideline</li> </ul> | Actinic keratosis                                                                                                                                            |
| Koh 2013      | Evaluation of guidelines of AASLD                                                                                                                                                                                                                                         | 3                   | 22                                           | 1998, 2000-2005, 2008-2011                                                                                      | Liver diseases                                                                                                                                               |
| Kredo 2012    | <ul style="list-style-type: none"> <li>▪ Assessment of the methodological quality of guidelines of the Southern African development community</li> <li>▪ Comparison of recommendations of the Southern African development community with reference guidelines</li> </ul> | 2                   | 5                                            | 2005, 2006, 2010                                                                                                | <ul style="list-style-type: none"> <li>▪ Diarrhoea</li> <li>▪ HIV</li> <li>▪ Hypertension</li> <li>▪ Malaria</li> <li>▪ Pre-eclampsia / eclampsia</li> </ul> |

| <b>Author / Year</b> | <b>Aim of publication</b>                                                                                                                                                                                                            | <b>Number of assessors</b> | <b>Number of guidelines appraised with AGREE II</b> | <b>Publication dates of guidelines included</b> | <b>Guideline topic</b>                                                               |
|----------------------|--------------------------------------------------------------------------------------------------------------------------------------------------------------------------------------------------------------------------------------|----------------------------|-----------------------------------------------------|-------------------------------------------------|--------------------------------------------------------------------------------------|
| Lambert 2015         | <ul style="list-style-type: none"> <li>▪ Production of a systematic review of guidelines</li> <li>▪ Assessment of the methodological quality of guidelines</li> <li>▪ Comparison of recommendations of several guidelines</li> </ul> | 2                          | 19                                                  | 2004-2006, 2009, 2011, 2012                     | Perioperative fasting                                                                |
| Langton 2011a        | Assessment of the methodological quality of eviQ guidelines                                                                                                                                                                          | 3                          | 2                                                   | No details provided                             | <ul style="list-style-type: none"> <li>▪ Breast cancer</li> <li>▪ Sarcoma</li> </ul> |
| Langton 2011b        | Assessment of the methodological quality of guidelines                                                                                                                                                                               | 3                          | 21                                                  | No details provided                             | <ul style="list-style-type: none"> <li>▪ Breast cancer</li> <li>▪ Sarcoma</li> </ul> |
| Larmer 2014          | Assessment of the methodological quality of guidelines                                                                                                                                                                               | 4                          | 17                                                  | 2001, 2003, 2005, 2007-2009, 2011-2013          | Osteoarthritis                                                                       |
| Lee 2014             | <ul style="list-style-type: none"> <li>▪ Assessment of the methodological quality of guidelines</li> <li>▪ Formulation of recommendations on the implementation of guidelines</li> </ul>                                             | 2                          | 18                                                  | 2001, 2006, 2009-2013                           | Acute procedural pain                                                                |
| Li 2015              | <ul style="list-style-type: none"> <li>▪ Assessment of the methodological quality of guidelines</li> <li>▪ Comparison of recommendations of several guidelines</li> </ul>                                                            | k. A.                      | 14                                                  | 2003, 2005, 2007, 2009-2012                     | Pancreatic cancer                                                                    |
| Li 2016              | <ul style="list-style-type: none"> <li>▪ Assessment of the methodological quality of guidelines</li> <li>▪ Comparison of recommendations of several guidelines</li> </ul>                                                            | 4                          | 8                                                   | 2011-2014                                       | Lung cancer                                                                          |
| Loder 2012           | <ul style="list-style-type: none"> <li>▪ Assessment of the methodological quality of guidelines</li> <li>▪ Comparison of recommendations of several guidelines</li> </ul>                                                            | 3                          | 3                                                   | 2009, 2012                                      | Migraine                                                                             |
| Lopez-Vargas 2013    | <ul style="list-style-type: none"> <li>▪ Assessment of the methodological quality of guidelines</li> </ul>                                                                                                                           | 2                          | 11                                                  | 2002, 2004, 2006, 2008, 2009, 2011              | Renal disease                                                                        |



| <b>Author / Year</b> | <b>Aim of publication</b>                                                                                                                                                                                                          | <b>Number of assessors</b> | <b>Number of guidelines appraised with AGREE II</b> | <b>Publication dates of guidelines included</b> | <b>Guideline topic</b>    |
|----------------------|------------------------------------------------------------------------------------------------------------------------------------------------------------------------------------------------------------------------------------|----------------------------|-----------------------------------------------------|-------------------------------------------------|---------------------------|
|                      | <ul style="list-style-type: none"> <li>▪ Comparison of recommendations of several guidelines</li> </ul>                                                                                                                            |                            |                                                     |                                                 |                           |
| Luitjes 2013         | <ul style="list-style-type: none"> <li>▪ Assessment of the methodological quality of guidelines</li> <li>▪ Comparison of recommendations of several guidelines</li> </ul>                                                          | 55                         | 6                                                   | 2002, 2004, 2005, 2008, 2010                    | Hypertension in pregnancy |
| Lytras 2014          | Assessment of the methodological quality of guidelines                                                                                                                                                                             | 6                          | 7                                                   | 1992, 1995, 1998, 2005, 2008, 2012              | Asthma                    |
| Marciano 2014        | <ul style="list-style-type: none"> <li>▪ Evaluation of the evidence base of guidelines</li> <li>▪ Assessment of the methodological quality of guidelines</li> <li>▪ Comparison of recommendations of several guidelines</li> </ul> | 4                          | 9                                                   | 2003, 2006-2008, 2010-2012                      | Melanoma                  |
| Nagler 2014          | Comparison of recommendations of several guidelines                                                                                                                                                                                | 4                          | 10                                                  | 2003-2004, 2007, 2008-2009, 2010-2014           | Hyponatraemia             |
| Nelson 2014          | Assessment of the methodological quality of guidelines                                                                                                                                                                             | 2                          | 16                                                  | 2003, 2005, 2007-2009, 2012, 2013               | Osteoarthritis            |
| Norberg 2012         | <ul style="list-style-type: none"> <li>▪ Examination of the level of knowledge of guideline users concerning the guideline recommendations</li> <li>▪ Survey of guidelines users' opinion on guideline quality</li> </ul>          | 4                          | 7                                                   | 1999, 2006, 2008, 2009                          | Cannabis abuse            |
| Nowobilski 2013      | <ul style="list-style-type: none"> <li>▪ Assessment of the methodological quality of guidelines</li> <li>▪ Comparison of recommendations of guidelines</li> </ul>                                                                  | 3                          | 2                                                   | 2009, 2011                                      | Asthma                    |
| Nuckols 2014         | <ul style="list-style-type: none"> <li>▪ Assessment of the methodological quality of guidelines</li> <li>▪ Comparison of recommendations of</li> </ul>                                                                             | 4-6                        | 13                                                  | 2002, 2008-2012                                 | Chronic pain              |

| <b>Author / Year</b> | <b>Aim of publication</b>                                                                                                                                                                                                   | <b>Number of assessors</b> | <b>Number of guidelines appraised with AGREE II</b> | <b>Publication dates of guidelines included</b> | <b>Guideline topic</b>                     |
|----------------------|-----------------------------------------------------------------------------------------------------------------------------------------------------------------------------------------------------------------------------|----------------------------|-----------------------------------------------------|-------------------------------------------------|--------------------------------------------|
|                      | guidelines                                                                                                                                                                                                                  |                            |                                                     |                                                 |                                            |
| Nuki 2014            | <ul style="list-style-type: none"> <li>▪ Assessment of the methodological quality of guidelines</li> <li>▪ Comparison of recommendations of guidelines</li> </ul>                                                           | 2                          | 4                                                   | 2006, 2007, 2012, 2014                          | Gout                                       |
| Olivera 2015         | Assessment of the methodological quality of guidelines                                                                                                                                                                      | 2                          | 5                                                   | 2005, 2010-2012                                 | Chagas disease                             |
| Padjas 2014          | Assessment of the methodological quality of guidelines                                                                                                                                                                      | 4                          | 10                                                  | 2000, 2006-2008, 2010, 2011                     | Allergic rhinitis                          |
| Pak 2014             | <ul style="list-style-type: none"> <li>▪ Assessment of the methodological quality of guidelines</li> <li>▪ Comparison of recommendations of several guidelines</li> </ul>                                                   | 2                          | 3                                                   | 2013                                            | Hypertension                               |
| Parisi 2014          | <ul style="list-style-type: none"> <li>▪ Assessment of the methodological quality of the process of guideline development with AGREE II</li> <li>▪ Identification of consistent and inconsistent recommendations</li> </ul> | 11                         | 6                                                   | 2002-2004, 2012                                 | Headache in children                       |
| Piano 2013           | Assessment of the methodological quality of guidelines                                                                                                                                                                      | 2                          | 9                                                   | 2006-2010                                       | Neuropathic pain in cancer patients        |
| Polus 2012           | Assessment of the methodological quality of guidelines                                                                                                                                                                      | 4                          | 4                                                   | 2007, 2009, 2011                                | Maternal health care                       |
| Qaseem 2013          | Assessment of the methodological quality of guidelines                                                                                                                                                                      | 4                          | 4                                                   | 2008-2010                                       | Prostate cancer                            |
| Rapoport 2015        | Assessment of the methodological quality of guidelines                                                                                                                                                                      | 8                          | 9                                                   | 2009-2013                                       | Driving with an illness                    |
| Rios 2014            | Assessment of the methodological quality of guidelines                                                                                                                                                                      | 3                          | 10                                                  | 2000, 2002, 2005, 2007, 2008, 2010, 2012        | Bleeding of oesophageal or gastric varices |
| Rohde 2013           | Assessment of the methodological                                                                                                                                                                                            | 2                          | 19                                                  | 2003, 2005, 2006                                | Stroke                                     |

| Author / Year           | Aim of publication                                                                                                                                                        | Number of assessors | Number of guidelines appraised with AGREE II | Publication dates of guidelines included | Guideline topic                                                                                                                                                                        |
|-------------------------|---------------------------------------------------------------------------------------------------------------------------------------------------------------------------|---------------------|----------------------------------------------|------------------------------------------|----------------------------------------------------------------------------------------------------------------------------------------------------------------------------------------|
|                         | quality of guidelines                                                                                                                                                     |                     |                                              | ,2008-2010                               |                                                                                                                                                                                        |
| Sabharwal 2014a         | Assessment of the methodological quality of AAOS guidelines                                                                                                               | 3                   | 14                                           | 2007, 2009-2013                          | Orthopaedics                                                                                                                                                                           |
| Sabharwal 2014b         | Assessment of the methodological quality of guidelines                                                                                                                    | 2                   | 7                                            | 2009-2013                                | Thrombosis prophylaxis for orthopaedic surgery                                                                                                                                         |
| San Martin-Galindo 2015 | Assessment of the methodological quality of guidelines                                                                                                                    | 2                   | 3                                            | 2004, 2005, 2012                         | Fissure sealing                                                                                                                                                                        |
| Sanclemente 2014        | Assessment of the methodological quality of guidelines                                                                                                                    | 3                   | 6                                            | 2007, 2009, 2011, 2012                   | Acne                                                                                                                                                                                   |
| Santos 2012             | Assessment of the methodological quality of guidelines                                                                                                                    | 4                   | 12                                           | 2000, 2002, 2005-2010                    | <ul style="list-style-type: none"> <li>▪ Anxiety disorders</li> <li>▪ Bipolar affective disorders</li> <li>▪ Depression</li> <li>▪ Mental disorders (not further specified)</li> </ul> |
| Schildmann 2015         | <ul style="list-style-type: none"> <li>▪ Comparison of recommendations of several guidelines</li> <li>▪ Assessment of the methodological quality of guidelines</li> </ul> | 2                   | 9                                            | 2003-2005, 2007, 2009, 2010, 2012        | Palliative sedation                                                                                                                                                                    |
| Schoenmaker 2013        | <ul style="list-style-type: none"> <li>▪ Assessment of the methodological quality of guidelines</li> <li>▪ Comparison of recommendations of several guidelines</li> </ul> | 3                   | 17                                           | 2000-2003, 2005-2007, 2009, 2011         | Dialysis                                                                                                                                                                               |
| Seron 2014              | <ul style="list-style-type: none"> <li>▪ Assessment of the methodological quality of guidelines</li> <li>▪ Comparison of recommendations of several guidelines</li> </ul> | 3                   | 9                                            | 1995, 1999, 2000, 2002, 2004, 2006, 2007 | Cardiologic rehabilitation                                                                                                                                                             |
| Shen 2014               | <ul style="list-style-type: none"> <li>▪ Assessment of the methodological quality of guidelines</li> </ul>                                                                | 2                   | 5                                            | 2003, 2008, 2009, 2011                   | Cushing syndrome                                                                                                                                                                       |

| Author / Year    | Aim of publication                                                                                                                                                        | Number of assessors | Number of guidelines appraised with AGREE II | Publication dates of guidelines included | Guideline topic                   |
|------------------|---------------------------------------------------------------------------------------------------------------------------------------------------------------------------|---------------------|----------------------------------------------|------------------------------------------|-----------------------------------|
|                  | <ul style="list-style-type: none"> <li>▪ Comparison of guideline recommendations</li> </ul>                                                                               |                     |                                              |                                          |                                   |
| Simons 2016      | <ul style="list-style-type: none"> <li>▪ Comparison of recommendations of several guidelines</li> <li>▪ Assessment of the methodological quality of guidelines</li> </ul> | 2                   | 7                                            | 2011-2014                                | Chronic heart failure             |
| Smith 2015       | <ul style="list-style-type: none"> <li>▪ Assessment of the methodological quality of guidelines</li> <li>▪ Comparison of recommendations of several guidelines</li> </ul> | 4                   | 3                                            | 2009, 2011-2013                          | Juvenile idiopathic arthritis     |
| Stacey 2013      | Development and evaluation of evidence-informed clinical nursing protocols for remote assessment, triage and support of cancer treatment-induced symptoms                 | 4                   | 12                                           | 2002, 2004, 2007, 2008                   | Cancer treatment-induced symptoms |
| Syan 2016        | <ul style="list-style-type: none"> <li>▪ Assessment of the methodological quality of guidelines</li> <li>▪ Comparison of guideline recommendations</li> </ul>             | 2                   | 5                                            | No details provided                      | Urinary incontinence              |
| Tian 2015        | Assessment of the methodological quality of guidelines                                                                                                                    | 4                   | 15                                           | 1997, 1998, 2003, 2007-2012              | Glioblastoma                      |
| Tremblay 2010    | <ul style="list-style-type: none"> <li>▪ Description of the update process of the Canadian Physical Activity Guidelines</li> </ul>                                        | 1                   | 1                                            | No details provided                      | Physical activity                 |
| Tudor 2013       | Assessment of the methodological quality of guidelines                                                                                                                    | 2                   | 7                                            | 2005, 2006, 2008, 2010                   | Neurology                         |
| Tunnicliffe 2015 | <ul style="list-style-type: none"> <li>▪ Assessment of the methodological quality of guidelines</li> <li>▪ Comparison of recommendations of guidelines</li> </ul>         | 2                   | 14                                           | 1999, 2008, 2010, 2012-2014              | Lupus erythematosus               |
| Vanclouster      | <ul style="list-style-type: none"> <li>▪ Assessment of the methodological</li> </ul>                                                                                      | 7                   | 3                                            | 2007, 2010, 2011                         | Haemochromatosis                  |

| <b>Author / Year</b> | <b>Aim of publication</b>                                                                                                                                                 | <b>Number of assessors</b> | <b>Number of guidelines appraised with AGREE II</b> | <b>Publication dates of guidelines included</b>                                                      | <b>Guideline topic</b>                         |
|----------------------|---------------------------------------------------------------------------------------------------------------------------------------------------------------------------|----------------------------|-----------------------------------------------------|------------------------------------------------------------------------------------------------------|------------------------------------------------|
| 2015                 | quality of guidelines<br><ul style="list-style-type: none"> <li>▪ Comparison of recommendations of several guidelines</li> </ul>                                          |                            |                                                     |                                                                                                      |                                                |
| Vanommeslaeghe 2015  | <ul style="list-style-type: none"> <li>▪ Assessment of the methodological quality of guidelines</li> <li>▪ Comparison of recommendations of several guidelines</li> </ul> | 4                          | 15                                                  | 2006, 2009 2011-2013                                                                                 | No details provided                            |
| Wang 2014            | Assessment of the methodological quality of guidelines                                                                                                                    | 3                          | 40                                                  | 1999, 2001, 2003-2005, 2007-2013                                                                     | Hepatocellular carcinoma or liver metastases   |
| Werner 2016          | Assessment of the methodological quality of guidelines of the European Dermatology Forum (EDF)                                                                            | 4                          | 25                                                  | <ul style="list-style-type: none"> <li>▪ 2009-2014</li> <li>▪ No details for 7 guidelines</li> </ul> | Dermatology                                    |
| White 2014           | Assessment of the methodological quality of a guideline                                                                                                                   | 18                         | 1                                                   | 2008                                                                                                 | Concussion during sports                       |
| Wilby 2015           | Assessment of the methodological quality of guidelines                                                                                                                    | 4                          | 20                                                  | 1997, 2001, 2004, 2006-2013                                                                          | Infectious diseases in children                |
| Wong 2015            | <ul style="list-style-type: none"> <li>▪ Assessment of the methodological quality of guidelines</li> <li>▪ Comparison of recommendations of several guidelines</li> </ul> | 2                          | 17                                                  | 1995, 2001-2004, 2007-2013                                                                           | Treatment of injuries due to traffic accidents |
| Wu 2015a             | Assessment of the methodological quality of guidelines                                                                                                                    | 4                          | 2                                                   | 2008, 2013                                                                                           | Macular degeneration                           |
| Wu 2015b             | Assessment of the methodological quality of guidelines                                                                                                                    | 4                          | 3                                                   | 2009, 2010                                                                                           | Open-angle glaucoma                            |
| Wu 2015c             | Assessment of the methodological quality of guidelines                                                                                                                    | 4                          | 3                                                   | 2012, 2013                                                                                           | Diabetic retinopathy                           |
| Wu 2015d             | Assessment of the methodological quality of guidelines                                                                                                                    | 4                          | 3                                                   | 2008, 2010, 2011                                                                                     | Cataract                                       |
| Yaman 2015           | Assessment of the methodological quality of NASS guidelines                                                                                                               | 4                          | 6                                                   | 2008-2013                                                                                            | Disorders of the spine                         |

| <b>Author / Year</b> | <b>Aim of publication</b>                                                                                                                                                 | <b>Number of assessors</b> | <b>Number of guidelines appraised with AGREE II</b> | <b>Publication dates of guidelines included</b> | <b>Guideline topic</b>                                                                       |
|----------------------|---------------------------------------------------------------------------------------------------------------------------------------------------------------------------|----------------------------|-----------------------------------------------------|-------------------------------------------------|----------------------------------------------------------------------------------------------|
| Yan 2013             | Assessment of the methodological quality of guidelines                                                                                                                    | 2                          | 10                                                  | 2002, 2003, 2007-2010                           | <ul style="list-style-type: none"> <li>▪ Hypertension</li> <li>▪ Pheochromocytoma</li> </ul> |
| Ye 2014              | <ul style="list-style-type: none"> <li>▪ Assessment of the methodological quality of guidelines</li> <li>▪ Comparison of recommendations of several guidelines</li> </ul> | 2                          | 12                                                  | 2008-2011, 2013, no details for 1 guideline     | Monitoring of vancomycin therapy                                                             |
| Yuwen 2015           | Assessment of the methodological quality of guidelines                                                                                                                    | 3                          | 5                                                   | 1996, 2002, 2008, 2011                          | Stroke                                                                                       |
| Zeng 2014            | <ul style="list-style-type: none"> <li>▪ Assessment of the methodological quality of guidelines</li> <li>▪ Comparison of recommendations of guidelines</li> </ul>         | 4                          | 13                                                  | 2005, 2006, 2008, 2009, 2012, 2013              | Upper respiratory tract infection in children                                                |
| Zhang 2014           | Assessment of the methodological quality of guidelines                                                                                                                    | 2                          | 17                                                  | 1999-2001, 2006-2012                            | Myasthenia gravis                                                                            |
