# Supplementary material for: Guideline appraisal with AGREE II: Systematic review of the current evidence on how users handle the 2 overall assessments
Source: PubMed Central journal article supplement (PMC5373625; doi:10.1371/journal.pone.0174831), 2017-03-30
Supplement: pone.0174831.s005.pdf [file pone.0174831.s005.pdf]

S5: Information on the performance of the 2 overall assessments of AGREE II

| <b>Author / Year</b>   | <b>Assessment of overall guideline quality provided</b> | <b>Recommendation for use provided</b> | <b>Deviation from AGREE II (overall guideline quality)</b> | <b>Deviation from AGREE II (recommendation for use)</b>                                                                                     |
|------------------------|---------------------------------------------------------|----------------------------------------|------------------------------------------------------------|---------------------------------------------------------------------------------------------------------------------------------------------|
| Abdelsattar 2015       | -                                                       | -                                      | -                                                          | -                                                                                                                                           |
| Acuna-Izcaray 2013     | -                                                       | X                                      | -                                                          | Specification of a fixed cut-off on the basis of standardized domain scores:<br>▪ “strongly recommended“ (standardized domain scores > 60%) |
| Agrawal 2012           | X                                                       | X                                      | no                                                         | no                                                                                                                                          |
| Al-Ansary 2013         | X                                                       | X                                      | no                                                         | no                                                                                                                                          |
| Altman 2015            | -                                                       | -                                      | -                                                          | -                                                                                                                                           |
| Alvarez-Vargas 2015    | X                                                       | X                                      | no                                                         | no                                                                                                                                          |
| Arevalo-Rodriguez 2013 | -                                                       | -                                      | -                                                          | -                                                                                                                                           |
| Armstrong 2016         | -                                                       | -                                      | -                                                          | -                                                                                                                                           |
| Avin 2015              | -                                                       | X                                      | -                                                          | no                                                                                                                                          |
| Barber 2015            | -                                                       | X                                      | -                                                          | no                                                                                                                                          |
| Bekkering 2014         | -                                                       | -                                      | -                                                          | -                                                                                                                                           |
| Binepal 2015           | X                                                       | -                                      | no                                                         | -                                                                                                                                           |

| <b>Author / Year</b> | <b>Assessment of overall guideline quality provided</b> | <b>Recommendation for use provided</b> | <b>Deviation from AGREE II (overall guideline quality)</b> | <b>Deviation from AGREE II (recommendation for use)</b>                                                                                                                                                                                                                                                                                                                                                                                                 |
|----------------------|---------------------------------------------------------|----------------------------------------|------------------------------------------------------------|---------------------------------------------------------------------------------------------------------------------------------------------------------------------------------------------------------------------------------------------------------------------------------------------------------------------------------------------------------------------------------------------------------------------------------------------------------|
| Birken 2015          | X                                                       | X                                      | no                                                         | Specification of a fixed cut-off on the basis of standardized domain scores and overall guideline quality: <ul style="list-style-type: none"> <li>▪ “strongly recommended” (standardized score <math>\geq</math> 50% in all domains)</li> <li>▪ “recommended” (overall assessment <math>\geq</math> 50%)</li> <li>▪ “not recommended” (standardized score of <math>&lt;</math> 50% in all domains; overall assessment <math>&lt;</math> 50%)</li> </ul> |
| Bragge 2014          | X                                                       | -                                      | no                                                         | -                                                                                                                                                                                                                                                                                                                                                                                                                                                       |
| Brosseau 2014a       | X                                                       | X                                      | no                                                         | Specification of a fixed cut-off on the basis of standardized domain scores: <ul style="list-style-type: none"> <li>▪ “recommended“ (standardized domain scores <math>&gt;</math> 60% in 3 out of 6 domains + domain 3 [rigour of development])</li> </ul>                                                                                                                                                                                              |
| Brosseau 2014b       | X                                                       | X                                      | no                                                         | Specification of a fixed cut-off on the basis of standardized domain scores: <ul style="list-style-type: none"> <li>▪ “recommended“ (standardized domain scores <math>&gt;</math> 60% in domain 3 + 3-4 other domains)</li> </ul>                                                                                                                                                                                                                       |
| Burda 2014           | X                                                       | X                                      | no                                                         | Consensus of individual assessments                                                                                                                                                                                                                                                                                                                                                                                                                     |
| Burnett 2014         | X                                                       | -                                      | Overall assessment calculated                              | -                                                                                                                                                                                                                                                                                                                                                                                                                                                       |
| Cassis 2015          | X                                                       | X                                      | -                                                          | Specification of a fixed cut-off on the basis of standardized domain scores and overall guideline quality: <ul style="list-style-type: none"> <li>▪ “strongly recommended” (standardized domain score <math>\geq</math> 50% in all domains; standardized domain score <math>\geq</math> 50% in 5 domains + standardized domain score 40% to 50% in 1 domain)</li> </ul>                                                                                 |

| Author / Year        | Assessment of overall guideline quality provided | Recommendation for use provided | Deviation from AGREE II (overall guideline quality) | Deviation from AGREE II (recommendation for use)                                                                                                                                                                                                                                                                                                                                                                                                                                                                              |
|----------------------|--------------------------------------------------|---------------------------------|-----------------------------------------------------|-------------------------------------------------------------------------------------------------------------------------------------------------------------------------------------------------------------------------------------------------------------------------------------------------------------------------------------------------------------------------------------------------------------------------------------------------------------------------------------------------------------------------------|
|                      |                                                  |                                 |                                                     | <ul style="list-style-type: none"> <li>▪ “recommended” (overall assessment <math>\geq 50\%</math>)</li> <li>▪ “not recommended” (overall assessment <math>&lt; 50\%</math>)</li> </ul>                                                                                                                                                                                                                                                                                                                                        |
| Castellani 2015      | -                                                | X                               | no                                                  | no                                                                                                                                                                                                                                                                                                                                                                                                                                                                                                                            |
| Chen 2015            | -                                                | X                               | no                                                  | <p>Specification of a fixed cut-off on the basis of standardized domain scores and overall guideline quality:</p> <ul style="list-style-type: none"> <li>▪ “recommended” (standardized domain score <math>\geq 60\%</math> in all domains)</li> <li>▪ “recommended with modifications” (standardized domain score <math>\geq 30\%</math> in 3 domains + standardized domain score <math>&lt; 60\%</math> in 1 domain)</li> <li>▪ “not recommended” (standardized domain score <math>&lt; 30\%</math> in 3 domains)</li> </ul> |
| Chua 2015            | X                                                | -                               | Overall assessment calculated                       | -                                                                                                                                                                                                                                                                                                                                                                                                                                                                                                                             |
| Colebatch-Bourn 2015 | X                                                | X                               | no                                                  | no                                                                                                                                                                                                                                                                                                                                                                                                                                                                                                                            |
| Damiani 2014         | -                                                | -                               | -                                                   | -                                                                                                                                                                                                                                                                                                                                                                                                                                                                                                                             |
| Dersch 2015          | X                                                | X                               | no                                                  | <p>Specification of a fixed cut-off on the basis of standardized domain scores:</p> <p>“not recommended” (standardized domain score <math>&lt; 50\%</math> in all domains)</p>                                                                                                                                                                                                                                                                                                                                                |
| Don-Wauchope 2012    | X                                                | X                               | no                                                  | no                                                                                                                                                                                                                                                                                                                                                                                                                                                                                                                            |

| <b>Author / Year</b> | <b>Assessment of overall guideline quality provided</b> | <b>Recommendation for use provided</b> | <b>Deviation from AGREE II (overall guideline quality)</b> | <b>Deviation from AGREE II (recommendation for use)</b>                                                                                                                                                                                                        |
|----------------------|---------------------------------------------------------|----------------------------------------|------------------------------------------------------------|----------------------------------------------------------------------------------------------------------------------------------------------------------------------------------------------------------------------------------------------------------------|
| Falconi 2015         | X                                                       | X                                      | no                                                         | no                                                                                                                                                                                                                                                             |
| Fisher 2014          | -                                                       | X                                      | -                                                          | no                                                                                                                                                                                                                                                             |
| Fouche 2014          | -                                                       | -                                      | -                                                          | -                                                                                                                                                                                                                                                              |
| Gamst-Jensen 2014    | -                                                       | -                                      | -                                                          | -                                                                                                                                                                                                                                                              |
| Gandhi 2015          | X                                                       | X                                      | no                                                         | no                                                                                                                                                                                                                                                             |
| Gillon 2014          | X                                                       | X                                      | no                                                         | no                                                                                                                                                                                                                                                             |
| Girardis 2016        | X                                                       | -                                      | no                                                         | no                                                                                                                                                                                                                                                             |
| Goyet 2014           | X                                                       | -                                      | no                                                         | -                                                                                                                                                                                                                                                              |
| Grimmer 2014         | X                                                       | -                                      | no                                                         | -                                                                                                                                                                                                                                                              |
| Gupta 2015           | -                                                       | -                                      | -                                                          | -                                                                                                                                                                                                                                                              |
| Gutarra-Vilchez 2014 | -                                                       | X                                      | -                                                          | Specification of a fixed cut-off on the basis of standardized domain scores:<br><ul style="list-style-type: none"> <li>▪ “recommended” (above 60%),</li> <li>▪ “recommended with modifications” (30-60%),</li> <li>▪ "not recommended" (below 30%).</li> </ul> |
| Haddadi 2015         | X                                                       | -                                      | Overall assessment calculated                              | -                                                                                                                                                                                                                                                              |
| Haran 2014           | X                                                       | -                                      | Overall assessment calculated                              | -                                                                                                                                                                                                                                                              |
| Harris 2012          | -                                                       | -                                      | -                                                          | -                                                                                                                                                                                                                                                              |
| He 2015              | -                                                       | -                                      |                                                            |                                                                                                                                                                                                                                                                |
| Heine 2015           | X                                                       | X                                      | no                                                         | no                                                                                                                                                                                                                                                             |

| <b>Author / Year</b> | <b>Assessment of overall guideline quality provided</b> | <b>Recommendation for use provided</b> | <b>Deviation from AGREE II (overall guideline quality)</b> | <b>Deviation from AGREE II (recommendation for use)</b>                                                                                                                                                                                                                                                                                                                                                                                                                                   |
|----------------------|---------------------------------------------------------|----------------------------------------|------------------------------------------------------------|-------------------------------------------------------------------------------------------------------------------------------------------------------------------------------------------------------------------------------------------------------------------------------------------------------------------------------------------------------------------------------------------------------------------------------------------------------------------------------------------|
| Henig 2013           | -                                                       | -                                      | -                                                          | -                                                                                                                                                                                                                                                                                                                                                                                                                                                                                         |
| Holmer 2013          | -                                                       | X                                      | -                                                          | Consensus of individual assessments                                                                                                                                                                                                                                                                                                                                                                                                                                                       |
| Holvoet 2015         | -                                                       | -                                      | -                                                          | -                                                                                                                                                                                                                                                                                                                                                                                                                                                                                         |
| Horner 2014          | -                                                       | -                                      | -                                                          | -                                                                                                                                                                                                                                                                                                                                                                                                                                                                                         |
| Huang 2015           | X                                                       | X                                      | no                                                         | <p>Specification of a fixed cut-off on the basis of standardized domain scores:</p> <ul style="list-style-type: none"> <li>▪ “strongly recommended” (standardized domain scores &gt; 60% in 4 domains)</li> <li>▪ “recommended” (standardized domain scores from 30% to 60% in <math>\geq 4</math> domains + standardized domain scores <math>\geq 60\%</math> in 2 domains)</li> <li>▪ “not recommended” (standardized domain scores &lt; 30% in <math>\geq 4</math> domains)</li> </ul> |
| Huang 2013           | X                                                       | -                                      | no                                                         | -                                                                                                                                                                                                                                                                                                                                                                                                                                                                                         |
| Jiang 2015           | -                                                       | -                                      | -                                                          | -                                                                                                                                                                                                                                                                                                                                                                                                                                                                                         |
| Jokhan 2015          | X                                                       | -                                      | no                                                         | -                                                                                                                                                                                                                                                                                                                                                                                                                                                                                         |
| Joosen 2015          | X                                                       | -                                      | no                                                         | no                                                                                                                                                                                                                                                                                                                                                                                                                                                                                        |
| Kawala 2014          | -                                                       | -                                      | -                                                          | -                                                                                                                                                                                                                                                                                                                                                                                                                                                                                         |
| Kim 2014             | -                                                       | -                                      | -                                                          | -                                                                                                                                                                                                                                                                                                                                                                                                                                                                                         |
| Kirby 2015           | X                                                       | X                                      | no                                                         | no                                                                                                                                                                                                                                                                                                                                                                                                                                                                                        |
| Koh 2013             | X                                                       | -                                      | no                                                         | -                                                                                                                                                                                                                                                                                                                                                                                                                                                                                         |
| Kredo 2012           | -                                                       | -                                      | -                                                          | -                                                                                                                                                                                                                                                                                                                                                                                                                                                                                         |

| <b>Author / Year</b> | <b>Assessment of overall guideline quality provided</b> | <b>Recommendation for use provided</b> | <b>Deviation from AGREE II (overall guideline quality)</b> | <b>Deviation from AGREE II (recommendation for use)</b>                                                                                                                                                                                                                                                                                                                                                                     |
|----------------------|---------------------------------------------------------|----------------------------------------|------------------------------------------------------------|-----------------------------------------------------------------------------------------------------------------------------------------------------------------------------------------------------------------------------------------------------------------------------------------------------------------------------------------------------------------------------------------------------------------------------|
| Lambert 2015         | X                                                       | -                                      | no                                                         | -                                                                                                                                                                                                                                                                                                                                                                                                                           |
| Langton 2011a        | X                                                       | -                                      | no                                                         | -                                                                                                                                                                                                                                                                                                                                                                                                                           |
| Langton 2011b        | X                                                       | -                                      | no                                                         | -                                                                                                                                                                                                                                                                                                                                                                                                                           |
| Larmer 2014          | -                                                       | X                                      | -                                                          | no                                                                                                                                                                                                                                                                                                                                                                                                                          |
| Lee 2014             | X                                                       | X                                      | no                                                         | Specification of a fixed cut-off on the basis of overall guideline quality: <ul style="list-style-type: none"> <li>▪ “recommended” (overall score of 6 or 7)</li> <li>▪ “recommended with modifications” (overall score of 3to 5)</li> <li>▪ “not recommended” (overall score of 1 or 2).</li> </ul>                                                                                                                        |
| Li 2015              | -                                                       | X                                      | -                                                          | Specification of a fixed cut-off on the basis of standardized domain scores: <ul style="list-style-type: none"> <li>▪ “strongly recommended” (standardized domain scores 60% in &gt; 5 domains)</li> <li>▪ “weakly recommended” (standardized domain scores 30% &gt; 4 domains + standardized domain scores 60% in 1 domain)</li> <li>▪ “not recommended” (standardized domain scores &lt; 30% in &gt; 3domains)</li> </ul> |
| Li 2016              | -                                                       | -                                      | -                                                          | -                                                                                                                                                                                                                                                                                                                                                                                                                           |
| Loder 2012           | X                                                       | X                                      | no                                                         | no                                                                                                                                                                                                                                                                                                                                                                                                                          |
| Lopez-Vargas 2013    | X                                                       | X                                      | no                                                         | Specification of a fixed cut-off on the basis of overall guideline quality: <ul style="list-style-type: none"> <li>▪ “recommended” (overall score of 5 to 7)</li> </ul>                                                                                                                                                                                                                                                     |

| <b>Author / Year</b> | <b>Assessment of overall guideline quality provided</b> | <b>Recommendation for use provided</b> | <b>Deviation from AGREE II (overall guideline quality)</b> | <b>Deviation from AGREE II (recommendation for use)</b>                                                                                                                                 |
|----------------------|---------------------------------------------------------|----------------------------------------|------------------------------------------------------------|-----------------------------------------------------------------------------------------------------------------------------------------------------------------------------------------|
|                      |                                                         |                                        |                                                            | <ul style="list-style-type: none"> <li>▪ “recommended with modifications” (overall score of 3 or 4)</li> <li>▪ “not recommended” (overall score of 1 or 2).</li> </ul>                  |
| Luitjes 2013         | -                                                       | X                                      | -                                                          | no                                                                                                                                                                                      |
| Lytras 2014          | X                                                       | X                                      | no                                                         | no                                                                                                                                                                                      |
| Marciano 2014        | X                                                       | X                                      | -                                                          | no                                                                                                                                                                                      |
| Nagler 2014          | -                                                       | -                                      | -                                                          | -                                                                                                                                                                                       |
| Nelson 2014          | X                                                       | -                                      | no                                                         | -                                                                                                                                                                                       |
| Norberg 2012         | X                                                       | -                                      | no                                                         | -                                                                                                                                                                                       |
| Nowobilski 2013      | X                                                       | X                                      | no                                                         | no                                                                                                                                                                                      |
| Nuckols 2014         | X                                                       | X                                      | no                                                         | no                                                                                                                                                                                      |
| Nuki 2014            | X                                                       | -                                      | no                                                         | -                                                                                                                                                                                       |
| Olivera 2015         | -                                                       | -                                      | -                                                          | -                                                                                                                                                                                       |
| Padjas 2014          | -                                                       | -                                      | -                                                          | -                                                                                                                                                                                       |
| Pak 2014             | X                                                       | -                                      | no                                                         | -                                                                                                                                                                                       |
| Parisi 2014          | X                                                       | X                                      | no                                                         | Specification of a fixed cut-off on the basis of standardized domain scores: <ul style="list-style-type: none"> <li>▪ “not recommended” (standardized domain score &lt; 50%)</li> </ul> |
| Piano 2013           | -                                                       | -                                      | -                                                          | -                                                                                                                                                                                       |
| Polus 2012           | X                                                       | X                                      | no                                                         | no                                                                                                                                                                                      |

| Author / Year           | Assessment of overall guideline quality provided | Recommendation for use provided | Deviation from AGREE II (overall guideline quality) | Deviation from AGREE II (recommendation for use)                                                                                                                                                                                                                                                                                                                                                                   |
|-------------------------|--------------------------------------------------|---------------------------------|-----------------------------------------------------|--------------------------------------------------------------------------------------------------------------------------------------------------------------------------------------------------------------------------------------------------------------------------------------------------------------------------------------------------------------------------------------------------------------------|
| Qaseem 2013             | X                                                | X                               | no                                                  | no                                                                                                                                                                                                                                                                                                                                                                                                                 |
| Rapoport 2015           | X                                                | X                               | no                                                  | no                                                                                                                                                                                                                                                                                                                                                                                                                 |
| Rios 2014               | X                                                | X                               | Overall assessment calculated                       | Specification of a fixed cut-off on the basis of standardized domain scores: <ul style="list-style-type: none"> <li>▪ “recommended” (standardized domain score <math>\geq 70\%</math>)</li> <li>▪ “not recommended” (standardized domain score <math>&lt; 70\%</math>)</li> </ul>                                                                                                                                  |
| Rohde 2013              | X                                                | X                               | no                                                  | Specification of a fixed cut-off on the basis of standardized domain scores: <ul style="list-style-type: none"> <li>▪ “recommended” (standardised domain score <math>\geq 66,67\%</math>)</li> <li>▪ “not recommended” (standardized domain score <math>&lt; 66,67\%</math>)</li> </ul>                                                                                                                            |
| Sabharwal 2014a         | X                                                | -                               | Overall assessment calculated                       | -                                                                                                                                                                                                                                                                                                                                                                                                                  |
| Sabharwal 2014b         | X                                                | X                               | no                                                  | no                                                                                                                                                                                                                                                                                                                                                                                                                 |
| San Martin-Galindo 2015 | X                                                | X                               | no                                                  | Specification of a fixed cut-off on the basis of standardized domain scores: <ul style="list-style-type: none"> <li>▪ “strongly recommended” (standardized domain scores <math>&gt; 60\%</math> in most domains)</li> <li>▪ “recommended” (standardized domain scores from 30% to 60% in most domains)</li> <li>▪ “not recommended” (standardized domain scores <math>&lt; 30\%</math> in most domains)</li> </ul> |
| Sanclemente             | -                                                | X                               | -                                                   | Specification of a fixed cut-off on the basis of standardized                                                                                                                                                                                                                                                                                                                                                      |



| Author / Year    | Assessment of overall guideline quality provided | Recommendation for use provided | Deviation from AGREE II (overall guideline quality) | Deviation from AGREE II (recommendation for use)                                                                                                                                                                                                                                                                                                                                     |
|------------------|--------------------------------------------------|---------------------------------|-----------------------------------------------------|--------------------------------------------------------------------------------------------------------------------------------------------------------------------------------------------------------------------------------------------------------------------------------------------------------------------------------------------------------------------------------------|
| 2014             |                                                  |                                 |                                                     | domain scores: <ul style="list-style-type: none"> <li>▪ “recommended” (standardized domain scores <math>\geq 60\%</math>)</li> <li>▪ “not recommended” (standardized domain scores <math>&lt; 60\%</math>)</li> </ul>                                                                                                                                                                |
| Santos 2012      | -                                                | X                               | -                                                   | Specification of a fixed cut-off on the basis of standardized domain scores: <ul style="list-style-type: none"> <li>▪ “recommended” (standardized domain scores <math>&gt; 60\%</math>),</li> <li>▪ “recommended with modifications” (standardized domain scores 30-60%),</li> <li>▪ “not recommended” (standardized domain scores <math>&lt; 30\%</math>).</li> </ul>               |
| Schildmann 2015  | -                                                | -                               | -                                                   | -                                                                                                                                                                                                                                                                                                                                                                                    |
| Schoenmaker 2013 | X                                                | X                               | Overall assessment calculated                       | Specification of a fixed cut-off on the basis of standardized domain scores: <ul style="list-style-type: none"> <li>▪ “recommended” (standardized domain score <math>\geq 50\%</math>)</li> <li>▪ “not recommended” (standardized domain score <math>&lt; 50\%</math>)</li> </ul>                                                                                                    |
| Seron 2014       | -                                                | X                               | -                                                   | Specification of a fixed cut-off on the basis of standardized domain scores with a general cut-off of 70% in all domains <sup>a</sup>                                                                                                                                                                                                                                                |
| Shen 2014        | -                                                | X                               | -                                                   | Specification of a fixed cut-off on the basis of standardized domain scores: <ul style="list-style-type: none"> <li>▪ “recommended” (standardized domain scores <math>&gt; 60\%</math> in 4-6 domains),</li> <li>▪ “recommended with modifications” (standardized domain scores 30-60% in most domains + standardized domain scores <math>&gt; 60\%</math> in 3 domains),</li> </ul> |

| Author / Year        | Assessment of overall guideline quality provided | Recommendation for use provided | Deviation from AGREE II (overall guideline quality) | Deviation from AGREE II (recommendation for use)                                                                                                                                                                     |
|----------------------|--------------------------------------------------|---------------------------------|-----------------------------------------------------|----------------------------------------------------------------------------------------------------------------------------------------------------------------------------------------------------------------------|
|                      |                                                  |                                 |                                                     | <ul style="list-style-type: none"> <li>▪ “not recommended” (standardized domain scores &lt; 30% in most domains).</li> </ul>                                                                                         |
| Simons 2016          | X                                                | -                               | no                                                  | -                                                                                                                                                                                                                    |
| Smith 2015           | X                                                | X                               | no                                                  | <p>Specification of a fixed cut-off on the basis of standardized domain scores:</p> <ul style="list-style-type: none"> <li>▪ “recommended” (standardized domain score 60 % in domain 3 + 2 other domains)</li> </ul> |
| Stacey 2013          | -                                                | X                               | -                                                   | Reporting of the number of assessors recommending the guideline for use                                                                                                                                              |
| Syan 2016            | X                                                | -                               | no                                                  | -                                                                                                                                                                                                                    |
| Tian 2015            | -                                                | -                               | -                                                   | -                                                                                                                                                                                                                    |
| Tremblay 2010        | -                                                | -                               | -                                                   | -                                                                                                                                                                                                                    |
| Tudor 2013           | X                                                | -                               | no                                                  | -                                                                                                                                                                                                                    |
| Tunnicliffe 2015     | X                                                | -                               | Overall assessment calculated                       | -                                                                                                                                                                                                                    |
| Vanclooster 2015     | X                                                | -                               | no                                                  | -                                                                                                                                                                                                                    |
| Vanommeslae ghe 2015 | X                                                | -                               | no                                                  | -                                                                                                                                                                                                                    |
| Wang 2014            | -                                                | X                               | -                                                   | <p>Specification of a fixed cut-off on the basis of standardized domain scores:</p> <ul style="list-style-type: none"> <li>▪ “strongly recommended” (standardized domain score &gt; 60%)</li> </ul>                  |

| Author / Year | Assessment of overall guideline quality provided | Recommendation for use provided | Deviation from AGREE II (overall guideline quality) | Deviation from AGREE II (recommendation for use)                                                                                                                                                                                                                                                                                                                                                                                                                                                       |
|---------------|--------------------------------------------------|---------------------------------|-----------------------------------------------------|--------------------------------------------------------------------------------------------------------------------------------------------------------------------------------------------------------------------------------------------------------------------------------------------------------------------------------------------------------------------------------------------------------------------------------------------------------------------------------------------------------|
|               |                                                  |                                 |                                                     | <p>in &gt; 5 domains,</p> <ul style="list-style-type: none"> <li>▪ “weakly recommended” (standardized domain scores &gt; 30% in &gt; 4 domains,</li> <li>▪ “not recommended” (standardized domain scores &lt; 30% in &gt; 3 domains).</li> </ul>                                                                                                                                                                                                                                                       |
| Werner 2016   | X                                                | X                               | no                                                  | no                                                                                                                                                                                                                                                                                                                                                                                                                                                                                                     |
| White 2014    | X                                                | X                               | Overall assessment calculated                       | no                                                                                                                                                                                                                                                                                                                                                                                                                                                                                                     |
| Wilby 2015    | X                                                | X                               | no                                                  | no                                                                                                                                                                                                                                                                                                                                                                                                                                                                                                     |
| Wong 2015     | -                                                | -                               | -                                                   | -                                                                                                                                                                                                                                                                                                                                                                                                                                                                                                      |
| Wu 2015a      | X                                                | -                               | no                                                  | -                                                                                                                                                                                                                                                                                                                                                                                                                                                                                                      |
| Wu 2015b      | X                                                | -                               | no                                                  | -                                                                                                                                                                                                                                                                                                                                                                                                                                                                                                      |
| Wu 2015c      | X                                                | -                               | no                                                  | -                                                                                                                                                                                                                                                                                                                                                                                                                                                                                                      |
| Wu 2015d      | X                                                | -                               | no                                                  | -                                                                                                                                                                                                                                                                                                                                                                                                                                                                                                      |
| Yaman 2015    | X                                                | -                               | Overall assessment calculated                       | -                                                                                                                                                                                                                                                                                                                                                                                                                                                                                                      |
| Yan 2013      | -                                                | X                               | -                                                   | <p>Specification of a fixed cut-off on the basis of standardized domain scores:</p> <ul style="list-style-type: none"> <li>▪ “strongly recommended” (standardized domain score &gt; 60% <math>\geq</math>4 domains),</li> <li>▪ “recommended with modifications” (standardized domain scores 30-60% in most domains + standardized domain scores <math>\geq</math> 60% in <math>\geq</math> 2 domains),</li> <li>▪ “not recommended” (standardized domain scores &lt; 30% in most domains).</li> </ul> |

| <b>Author / Year</b>                                                                                             | <b>Assessment of overall guideline quality provided</b> | <b>Recommendation for use provided</b> | <b>Deviation from AGREE II (overall guideline quality)</b> | <b>Deviation from AGREE II (recommendation for use)</b>                                                                                                                                                                                                                                                                                                                                                                                                          |
|------------------------------------------------------------------------------------------------------------------|---------------------------------------------------------|----------------------------------------|------------------------------------------------------------|------------------------------------------------------------------------------------------------------------------------------------------------------------------------------------------------------------------------------------------------------------------------------------------------------------------------------------------------------------------------------------------------------------------------------------------------------------------|
| Ye 2014                                                                                                          | -                                                       | X                                      | -                                                          | no                                                                                                                                                                                                                                                                                                                                                                                                                                                               |
| Yuwen 2015                                                                                                       | X                                                       | X                                      | no                                                         | no                                                                                                                                                                                                                                                                                                                                                                                                                                                               |
| Zeng 2014                                                                                                        | -                                                       | X                                      | -                                                          | no                                                                                                                                                                                                                                                                                                                                                                                                                                                               |
| Zhang 2014                                                                                                       | -                                                       | X                                      |                                                            | <p>Specification of a fixed cut-off on the basis of standardized domain scores:</p> <ul style="list-style-type: none"> <li>▪ “strongly recommended” (standardized domain score &gt; 50% in 4 domains)</li> <li>▪ “recommended” (standardized domain score &gt; 50% in 3 domains)</li> <li>▪ “weakly recommended” (standardized domain score &gt; 50% in 1-2 domains)</li> <li>▪ “not recommended” (standardized domain score &lt; 50% in all domains)</li> </ul> |
| <p>x: Information provided in the publication.<br/>           -: No information provided in the publication.</p> |                                                         |                                        |                                                            |                                                                                                                                                                                                                                                                                                                                                                                                                                                                  |
