# Supplementary material for: Guideline appraisal with AGREE II: Systematic review of the current evidence on how users handle the 2 overall assessments
Source: PubMed Central journal article supplement (PMC5373625; doi:10.1371/journal.pone.0174831), 2017-03-30
Supplement: pone.0174831.s006.pdf [file pone.0174831.s006.pdf]

## S6: Statistics for the multiple regression analysis

### Analysis of variance

| Model |            | Sum of Squares | df  | Mean Square | F       | Sig.              |
|-------|------------|----------------|-----|-------------|---------|-------------------|
| 1     | Regression | 216426.103     | 6   | 36071.017   | 327.181 | .000 <sup>a</sup> |
|       | Residual   | 78496.575      | 712 | 110.248     |         |                   |
|       | Total      | 294922.678     | 718 |             |         |                   |

a. Predictors: (constant), Domain 6, Domain 4, Domain 5, Domain 2, Domain 1, Domain 3

b. Dependent variable: overall guideline quality

### Collinearity statistics

| Model |            | Tolerance | VIF   |
|-------|------------|-----------|-------|
| 1     | (Constant) |           |       |
|       | Domain 1   | .516      | 1.937 |
|       | Domain 2   | .494      | 2.023 |
|       | Domain 3   | .378      | 2.647 |
|       | Domain 4   | .570      | 1.756 |
|       | Domain 5   | .670      | 1.492 |
|       | Domain 6   | .644      | 1.552 |

### Fit Diagnostics for Total

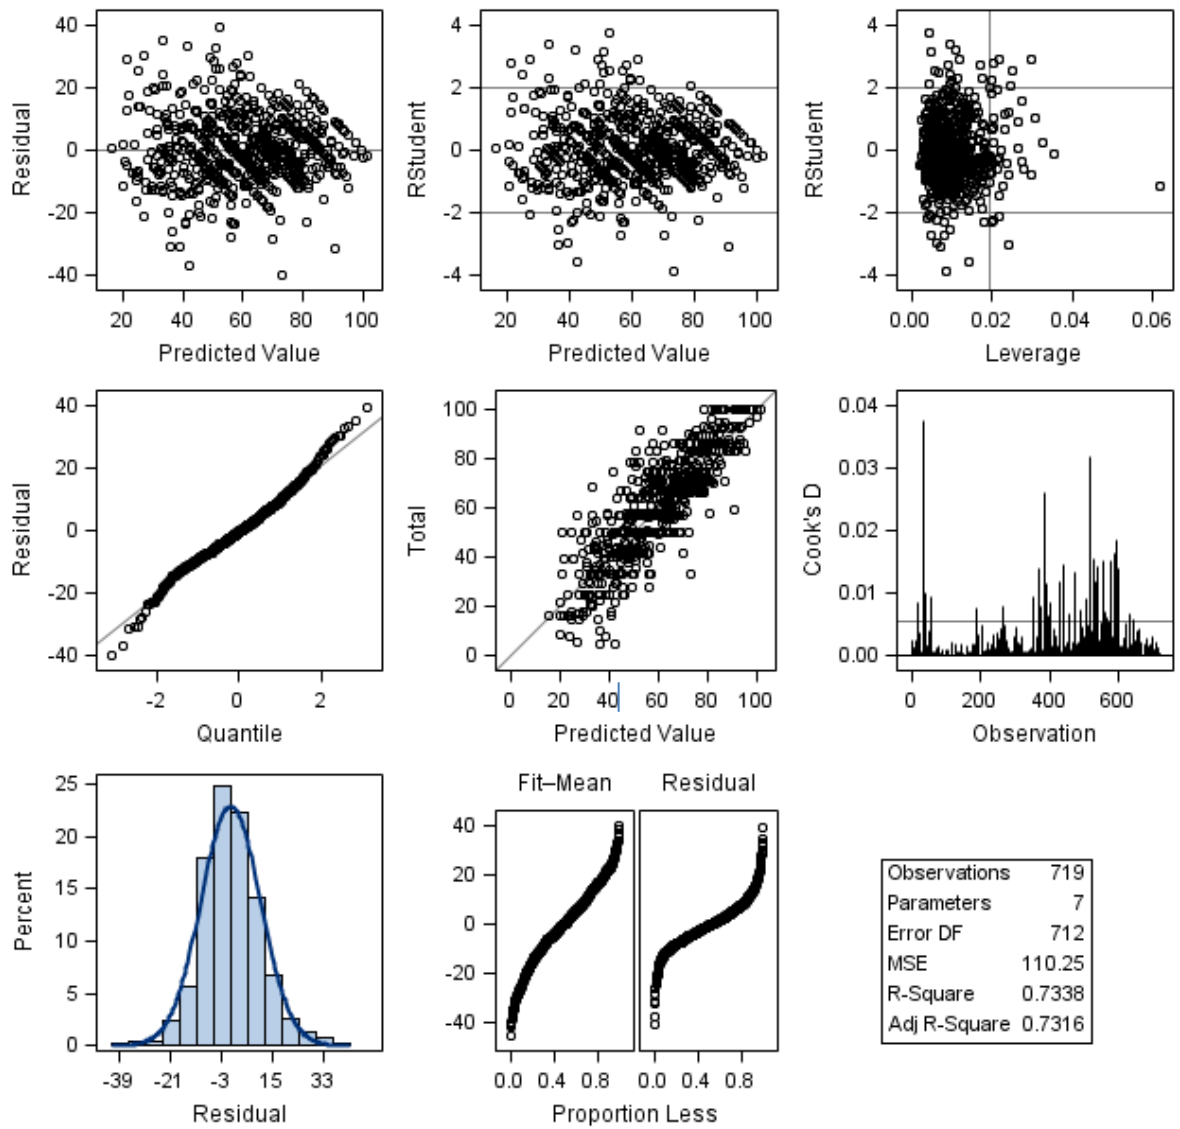

|              |        |
|--------------|--------|
| Observations | 719    |
| Parameters   | 7      |
| Error DF     | 712    |
| MSE          | 110.25 |
| R-Square     | 0.7338 |
| Adj R-Square | 0.7316 |

Residual by Regressors for Total

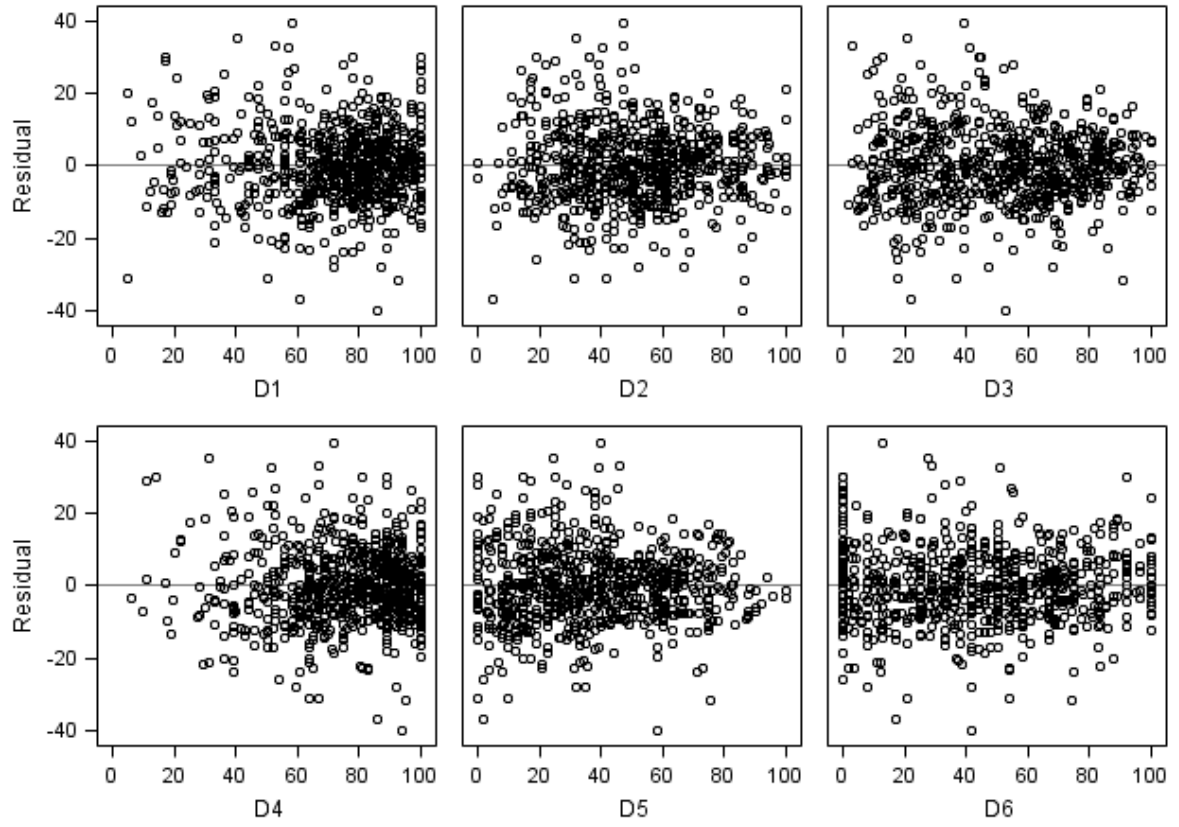

**Correlations of independent variables**

|                              | Domain1 | Domain 2 | Domain 3 | Domain 4 | Domain 5 | Domain 6 |
|------------------------------|---------|----------|----------|----------|----------|----------|
| Pearson correlation Domain 1 | 1.000   | .555     | .616     | .573     | .416     | .342     |
| Domain 2                     | .555    | 1.000    | .659     | .467     | .484     | .446     |
| Domain 3                     | .616    | .659     | 1.000    | .561     | .440     | .571     |
| Domain 4                     | .573    | .467     | .561     | 1.000    | .455     | .315     |
| Domain 5                     | .416    | .484     | .440     | .455     | 1.000    | .385     |
| Domain 6                     | .342    | .446     | .571     | .315     | .385     | 1.000    |

## Descriptive statistics

|                                 | Mean    | Std. Deviation | N   |
|---------------------------------|---------|----------------|-----|
| Assessment of guideline quality | 61.1585 | 20.26711       | 719 |
| Domain 1                        | 72.3956 | 21.10985       | 719 |
| Domain 2                        | 51.2753 | 21.24538       | 719 |
| Domain 3                        | 51.0951 | 25.04452       | 719 |
| Domain 4                        | 75.7952 | 19.42430       | 719 |
| Domain 5                        | 37.2841 | 23.19451       | 719 |
| Domain 6                        | 44.1308 | 28.72576       | 719 |

## Model summary<sup>b</sup>

| Model | R                 | R Square | Adjusted R Square | Std. Error of the Estimate |
|-------|-------------------|----------|-------------------|----------------------------|
| 1     | .857 <sup>a</sup> | .734     | .732              | 10.49990                   |

a. Predictors: (constant), Domain 6, Domain 4, Domain 5, Domain 2, Domain 1, Domain 3

b. Dependent variable: Overall assessment 1

| Model |            | Unstandardized Coefficients |            | Standardized | t      | Sig. | Correlations |         |      |
|-------|------------|-----------------------------|------------|--------------|--------|------|--------------|---------|------|
|       |            | B                           | Std. Error | Beta         |        |      | Zero-order   | Partial | Part |
|       |            |                             |            |              |        |      |              |         |      |
| 1     | (Constant) | 5.591                       | 1.753      |              | 3.190  | .001 |              |         |      |
|       | Domain 1   | .175                        | .026       | .183         | 6.784  | .000 | .668         | .246    | .131 |
|       | Domain 2   | .062                        | .026       | .065         | 2.381  | .018 | .634         | .089    | .046 |
|       | Domain 3   | .300                        | .025       | .371         | 11.796 | .000 | .771         | .404    | .228 |
|       | Domain 4   | .203                        | .027       | .194         | 7.583  | .000 | .652         | .273    | .147 |
|       | Domain 5   | .163                        | .021       | .187         | 7.913  | .000 | .582         | .284    | .153 |
|       | Domain 6   | .065                        | .017       | .093         | 3.841  | .000 | .529         | .142    | .074 |

**Residuals statistics<sup>a</sup>**

|                      | Minimum   | Maximum  | Mean    | Std. Deviation | N   |
|----------------------|-----------|----------|---------|----------------|-----|
| Predicted value      | 15,9166   | 101,5885 | 61,1585 | 17,36171       | 719 |
| Residual             | -40,21762 | 39,29159 | ,00000  | 10,45594       | 719 |
| Std. predicted value | -2,606    | 2,329    | ,000    | 1,000          | 719 |
| Std. residual        | -3,830    | 3,742    | ,000    | ,996           | 719 |

a. Dependent variable: overall guideline quality
