# Supplementary material for: Guideline appraisal with AGREE II: Systematic review of the current evidence on how users handle the 2 overall assessments
Source: PubMed Central journal article supplement (PMC5373625; doi:10.1371/journal.pone.0174831), 2017-03-30
Supplement: pone.0174831.s007.pdf [file pone.0174831.s007.pdf]

**S7: Assessment of model quality of the multinomial regression analysis**

| Statistics for model adaption |                |                          |
|-------------------------------|----------------|--------------------------|
| Criterion                     | Constants only | Constants and covariates |
| AIC                           | 1561.621       | 1048.277                 |
| SC                            | 1570.891       | 1113.162                 |
| -2 LOG L                      | 1557.621       | 1020.277                 |

|          |        |                            |        |
|----------|--------|----------------------------|--------|
| R square | 0.5064 | Max- newly scaled R square | 0.5815 |
|----------|--------|----------------------------|--------|

| Test – global null hypothesis: BETA=0 |            |    |            |
|---------------------------------------|------------|----|------------|
| Test                                  | Chi-square | DF | Pr > ChiSq |
| Likelihood ratio                      | 537.3440   | 12 | <.0001     |
| Score                                 | 406.5291   | 12 | <.0001     |
| Wald                                  | 247.0930   | 12 | <.0001     |

| Pearson correlation coefficients, N = 761 |       |       |       |       |       |       |
|-------------------------------------------|-------|-------|-------|-------|-------|-------|
| Domain                                    | D1    | D2    | D3    | D4    | D5    | D6    |
| D1                                        | 1.000 | 0.554 | 0.589 | 0.544 | 0.371 | 0.416 |
| D22                                       | 0.554 | 1.000 | 0.670 | 0.492 | 0.534 | 0.435 |
| D33                                       | 0.589 | 0.670 | 1.000 | 0.571 | 0.484 | 0.564 |
| D44                                       | 0.544 | 0.492 | 0.571 | 1.000 | 0.448 | 0.370 |
| D55                                       | 0.371 | 0.534 | 0.484 | 0.448 | 1.000 | 0.427 |
| D6                                        | 0.416 | 0.435 | 0.564 | 0.370 | 0.427 | 1.000 |
